# Supplementary material for: Aggregation-induced emission of cyclometalated rhodium(iii) and iridium(iii) phenylpyridine complexes with ancillary 1,3-diketones
Source: Royal Society of Chemistry journal article supplement (doi:10.1039/d3dt02651e), 2023-01-01
Supplement: d3dt02651e1.pdf [file d3dt02651e1.pdf]

Supporting Information

**Aggregation-induced emission of cyclometalated rhodium(III) and iridium(III) phenylpyridine complexes with ancillary 1,3-diketones**

Marina A. Kiseleva, Andrei V. Churakov, Ilya V. Taydakov, Mikhail T. Metlin, Sergey A. Kozyukhin and Stanislav I. Bezzubov

Part 1. Experimental Section.

Part 2. NMR spectroscopy and HRMS data: Figures S1 – S27, Table S1.

Part 3. X-ray crystallography: Tables S2 – S3, Figures S28 – S37.

Part 4. Spectroscopic study. Figure S38 – S47.

Part 5. Computational details: Tables S4 – S9, Figures S48 – S50.

## 1. Experimental Section

### Materials and methods

All commercially available reagents were at least reagent grade and used without further purification. Solvents were distilled and dried according to standard procedures. Preparation of rhodium(III) and iridium(III) complexes was carried out under dry argon. Purification and other manipulations with complexes were performed in air.

$^1\text{H}$  NMR spectra were acquired at 25 °C on a Bruker Avance 400 instrument and chemical shifts were reported in ppm referenced to residual solvent signals. High resolution and accurate mass measurements were carried out using a Bruker microTOF-Q<sup>TM</sup> APPI-TOF (Atmospheric Pressure PhotoIonization / Time of Flight) spectrometer. Electronic absorption spectra were measured on an OKB Spectr SF-2000 spectrophotometer. Luminescence measurements of the complexes in solution were performed on a Perkin-Elmer LS-55 spectrometer. For solids and suspensions, luminescence measurements were performed on a Horiba Fluorolog QM spectrometer equipped with a 75 W xenon arc lamp as the excitation source for steady state experiments, 150 W xenon flash lamp and pulse DeltaLED sources for kinetic measurements. An R-13456 photomultiplier was used as a detector. The quantum yield measurements were carried out on solid samples with a Spectralone-covered G8 integration sphere (GMP SA, Switzerland) according to the absolute method of Wrighton [1-3]. Each sample was measured several times under slightly different experimental conditions. The estimated error for quantum yields was  $\pm 10\%$ . Powdered samples were placed in quartz tubes (4 mm o.d.), flushed with dry nitrogen and sealed. These tubes were used for both luminescent and quantum yield measurements. An Econix-Expert Ltd Ecotest-VA polarograph was used for electrochemical measurements with a glassy carbon working electrode, platinum counter electrode, and saturated Ag/AgCl reference electrode. Polarographic curves were recorded in Ar-saturated acetonitrile with 0.1 M (*n*-Bu<sub>4</sub>N)PF<sub>6</sub> at a scan rate of 100 mV/s. Ferrocene was used as an external standard prior to and after measurements. Scanning electron microscopic (SEM) imaging of the precipitated complexes was performed using a Helios G4CX FEI (Thermo Fisher Scientific Inc., Waltham, MA, USA).

### Synthesis

Preparation of cyclometalated Ir(III) and Rh(III) chloride precursors:

IrCl<sub>3</sub>·3H<sub>2</sub>O (0.055 g, 0.156 mmol) or RhCl<sub>3</sub>·3H<sub>2</sub>O (0.055 g, 0.209 mmol) and 2-phenylpyridine (0.390 mmol or 0.523 mmol, respectively) were refluxed for 18 h in 2-

ethoxyethanol (15 mL). After cooling to room temperature, the resulting yellow solids were collected, washed with ethanol, ether, dissolved in CH<sub>2</sub>Cl<sub>2</sub>, purified by recrystallization from CH<sub>2</sub>Cl<sub>2</sub>/petroleum ether and dried in vacuo.

**[Ir(ppy)<sub>2</sub>Cl]<sub>2</sub>**: yellow – orange powder, yield 80%.

**[Rh(ppy)<sub>2</sub>Cl]<sub>2</sub>**: pale yellow powder, yield 76%.

<sup>1</sup>H NMR (400 MHz, CDCl<sub>3</sub>) δ 9.22 (d, *J* = 5.5 Hz, 4H), 7.89 – 7.79 (m, 8H), 7.57 – 7.54 (m, 4H), 6.85 – 6.76 (m, 8H), 6.65 (t, *J* = 7.5 Hz, 4H), 5.95 (d, *J* = 7.8 Hz, 4H).

M.p. >310 °C.

Complexes **Rh1 – Rh4** and **Ir1 – Ir4** were obtained according to a general procedure:

Cyclometalated Ir(III) or Rh(III) chloride (1 mmol), corresponding diketone (2.5 mmol) and K<sub>2</sub>CO<sub>3</sub> (10 mmol) were mixed in dry acetonitrile (5 ml) and refluxed for 16-20 h in darkness. The precipitate formed (from pale yellow to dark orange) was collected by filtration, washed with water, dissolved in CH<sub>2</sub>Cl<sub>2</sub>, purified by recrystallization from CH<sub>2</sub>Cl<sub>2</sub>/petroleum ether and dried in vacuo.

**Rh(ppy)<sub>2</sub>(dbm) (Rh1)**: yellow powder, yield 80%.

<sup>1</sup>H NMR (400 MHz, CDCl<sub>3</sub>) δ 8.61 – 8.57 (m, 2H), 7.87 (d, *J* = 8.0 Hz, 2H), 7.82 – 7.77 (m, 6H), 7.64 (dd, *J*<sub>1</sub> = 7.7, *J*<sub>2</sub> = 1.3 Hz, 2H), 7.39 – 7.34 (m, 2H), 7.33 – 7.28 (m, 4H), 7.13 – 7.08 (m, 2H), 6.95 (td, *J*<sub>1</sub> = 7.5, *J*<sub>2</sub> = 1.2 Hz, 2H), 6.83 (td, *J*<sub>1</sub> = 7.5, *J*<sub>2</sub> = 1.4 Hz, 2H), 6.56 (s, 1H), 6.41 (d, *J* = 7.6 Hz, 2H).

HRMS (API) *m/z*: [M+H]<sup>+</sup> Calcd for C<sub>37</sub>H<sub>28</sub>N<sub>2</sub>O<sub>2</sub>Rh 635.1201; Found 635.1194.

M.p. >310 °C.

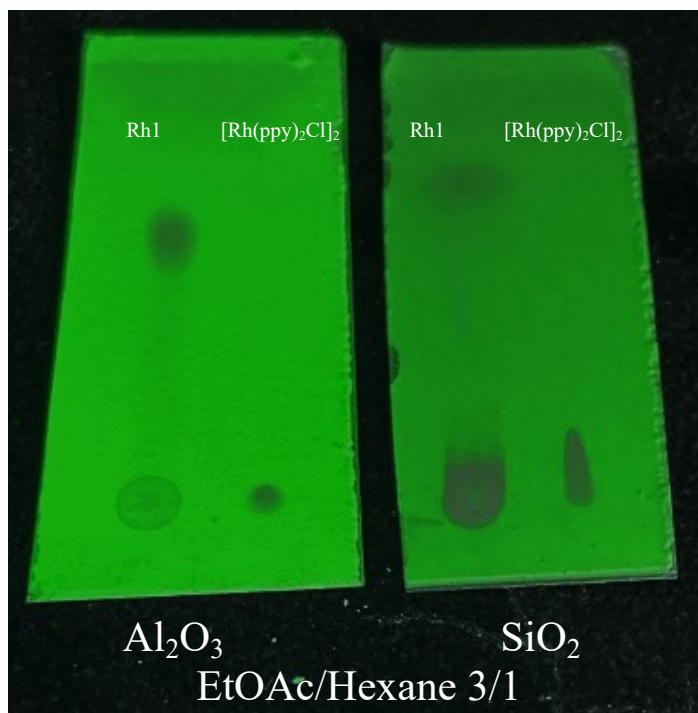

**Rh(ppy)<sub>2</sub>(bza) (Rh2):** pale yellow powder, yield 85%.

<sup>1</sup>H NMR (400 MHz, CDCl<sub>3</sub>) δ 8.57 (d, *J* = 5.5 Hz, 1H), 8.53 (d, *J* = 5.5 Hz, 1H), 7.90 – 7.80 (m, 4H), 7.72 – 7.68 (m, 2H), 7.64 – 7.59 (m, 2H), 7.35 – 7.30 (m, 1H), 7.26 – 7.23 (m, 2H), 7.19 – 7.11 (m, 2H), 6.95 – 6.88 (m, 2H), 6.82 – 6.77 (m, 2H), 6.38 – 6.32 (m, 2H), 5.89 (s, 1H), 2.02 (s, 3H).

HRMS (API) *m/z*: [M]<sup>+</sup> Calcd for C<sub>32</sub>H<sub>25</sub>N<sub>2</sub>O<sub>2</sub>Rh 572.0971; Found 572.0963.

M.p. 279-280 °C.

**Rh(ppy)<sub>2</sub>(tfbza) (Rh3):** yellow powder, yield 92%.

<sup>1</sup>H NMR (400 MHz, CDCl<sub>3</sub>) δ 8.52 (d, *J* = 5.6 Hz, 1H), 8.41 (d, *J* = 5.6 Hz, 1H), 7.91 – 7.83 (m, 4H), 7.77 – 7.73 (m, 2H), 7.64 – 7.60 (m, 2H), 7.45 – 7.39 (m, 1H), 7.34 – 7.29 (m, 2H), 7.23 – 7.18 (m, 1H), 7.17 – 7.12 (m, 1H), 6.99 – 6.91 (m, 2H), 6.85 – 6.77 (m, 2H), 6.36 (d, *J* = 7.7 Hz, 1H), 6.32 – 6.28 (m, 2H).

HRMS (API) *m/z*: [M]<sup>+</sup> Calcd for C<sub>32</sub>H<sub>22</sub>F<sub>3</sub>N<sub>2</sub>O<sub>2</sub>Rh 626.0688; Found 626.0682.

M.p. 290-291 °C.

**Rh(ppy)<sub>2</sub>(tta) (Rh4):** yellow powder, yield 84%.

<sup>1</sup>H NMR (400 MHz, CDCl<sub>3</sub>) δ 8.53 – 8.50 (m, 1H), 8.47 – 8.43 (m, 1H), 7.90 – 7.83 (m, 4H), 7.63 – 7.59 (m, 2H), 7.56 (dd, *J*<sub>1</sub> = 3.8, *J*<sub>2</sub> = 1.1 Hz, 1H), 7.40 (dd, *J*<sub>1</sub> = 5.0, *J*<sub>2</sub> = 1.1 Hz, 1H),

7.23 – 7.19 (m, 1H), 7.19 – 7.14 (m, 1H), 7.01 – 6.90 (m, 3H), 6.84 – 6.76 (m, 2H), 6.34 (d,  $J = 7.6$  Hz, 1H), 6.28 (d,  $J = 7.6$  Hz, 1H), 6.15 (s, 1H).

HRMS (API)  $m/z$ :  $[M]^+$  Calcd for  $C_{30}H_{20}F_3N_2O_2RhS$  632.0253; Found 632.0243.

M.p.  $>310$  °C.

**Ir(ppy)<sub>2</sub>(dbm) (Ir1)**: light orange powder, yield 65%.

<sup>1</sup>H NMR (400 MHz, CDCl<sub>3</sub>)  $\delta$  8.60 (d,  $J = 5.0$  Hz, 2H), 7.87 (d,  $J = 8.1$  Hz, 2H), 7.84 – 7.79 (m, 4H), 7.72 – 7.66 (m, 2H), 7.62 – 7.58 (m, 2H), 7.43 – 7.38 (m, 2H), 7.33 – 7.27 (m, 4H), 7.08 – 7.02 (m, 2H), 6.89 – 6.84 (m, 2H), 6.75 (td,  $J_1 = 7.4$ ,  $J_2 = 1.2$  Hz, 2H), 6.59 (s, 1H), 6.41 – 6.34 (m, 2H).

HRMS (API)  $m/z$ :  $[M]^+$  Calcd for  $C_{37}H_{27}N_2O_2Ir$  724.1699; Found 724.1700.

M.p. 302-303 °C.

**Ir(ppy)<sub>2</sub>(bza) (Ir2)**: dark yellow powder, yield 86%.

<sup>1</sup>H NMR (400 MHz, CDCl<sub>3</sub>)  $\delta$  8.58 (d,  $J = 5.6$  Hz, 1H), 8.54 (d,  $J = 5.5$  Hz, 1H), 7.86 (t,  $J = 8.9$  Hz, 2H), 7.75 – 7.68 (m, 4H), 7.60 – 7.56 (m, 2H), 7.39 – 7.33 (m, 1H), 7.27 – 7.23 (m, 2H), 7.13 – 7.05 (m, 2H), 6.86 – 6.80 (m, 2H), 6.75 – 6.69 (m, 2H), 6.37 – 6.28 (m, 2H), 5.90 (s, 1H), 1.92 (s, 3H).

HRMS (API)  $m/z$ :  $[M]^+$  Calcd for  $C_{32}H_{25}N_2O_2Ir$  662.1542; Found 662.1540.

M.p. 274-274 °C.

**Ir(ppy)<sub>2</sub>(tfbza) (Ir3)**: orange powder, yield 89%.

<sup>1</sup>H NMR (400 MHz, CDCl<sub>3</sub>)  $\delta$  8.52 (d,  $J = 5.5$  Hz, 1H), 8.41 (d,  $J = 5.7$  Hz, 1H), 7.88 (t,  $J = 8.2$  Hz, 2H), 7.79 – 7.73 (m, 4H), 7.60 – 7.56 (m, 2H), 7.48 (t,  $J = 7.5$  Hz, 1H), 7.31 (t,  $J = 7.8$  Hz, 2H), 7.18 – 7.14 (m, 1H), 7.12 – 7.07 (m, 1H), 6.91 – 6.83 (m, 2H), 6.77 – 6.70 (m, 2H), 6.34 – 6.30 (m, 2H), 6.27 (d,  $J = 7.6$  Hz, 1H).

HRMS (API)  $m/z$ :  $[M]^+$  Calcd for  $C_{32}H_{22}F_3N_2O_2Ir$  716.1259; Found 716.1257.

M.p. 298-299 °C.

**Ir(ppy)<sub>2</sub>(tta) (Ir4)**: dark orange - red powder, yield 74%.

<sup>1</sup>H NMR (400 MHz, CDCl<sub>3</sub>)  $\delta$  8.51 (d,  $J = 5.7$  Hz, 1H), 8.46 (d,  $J = 5.7$  Hz, 1H), 7.87 (t,  $J = 8.4$  Hz, 2H), 7.79 – 7.73 (m, 2H), 7.64 – 7.62 (m, 1H), 7.57 (d,  $J = 8.0$  Hz, 2H), 7.49 – 7.47 (m,

1H), 7.19 – 7.14 (m, 1H), 7.14 – 7.10 (m, 1H), 7.02 – 6.98 (m, 1H), 6.89 – 6.82 (m, 2H), 6.76 – 6.69 (m, 2H), 6.31 – 6.28 (m, 1H), 6.26 – 6.23 (m, 1H), 6.16 (s, 1H).

HRMS (API) m/z: [M]<sup>+</sup> Calcd for C<sub>30</sub>H<sub>20</sub>F<sub>3</sub>N<sub>2</sub>O<sub>2</sub>IrS 722.0821; Found 722.0822.

M.p. >310 °C.

## 2. NMR spectroscopy data and high-resolution mass-spectrometry data

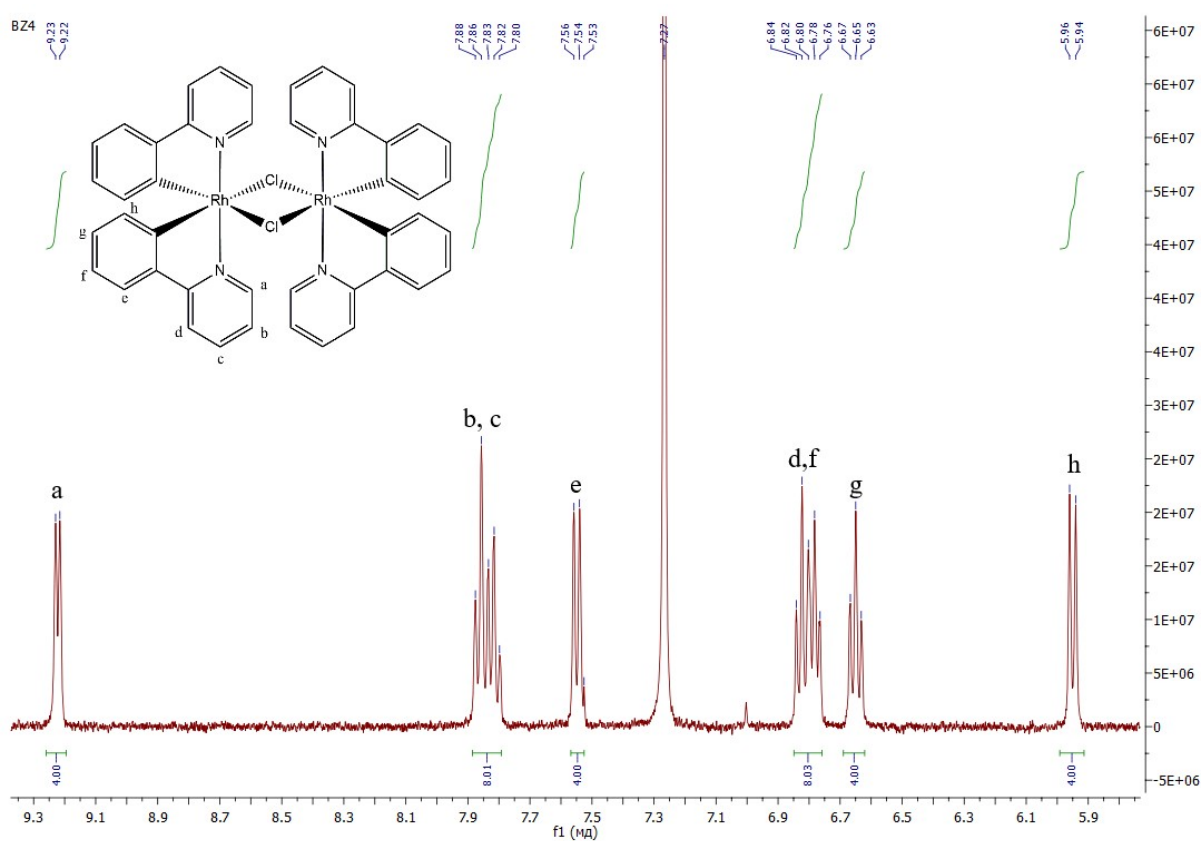

Figure S1.  $^1\text{H}$  NMR spectrum of  $[\text{Rh}(\text{ppy})_2\text{Cl}]_2$  (400 MHz, 298K,  $\text{CDCl}_3$ ).

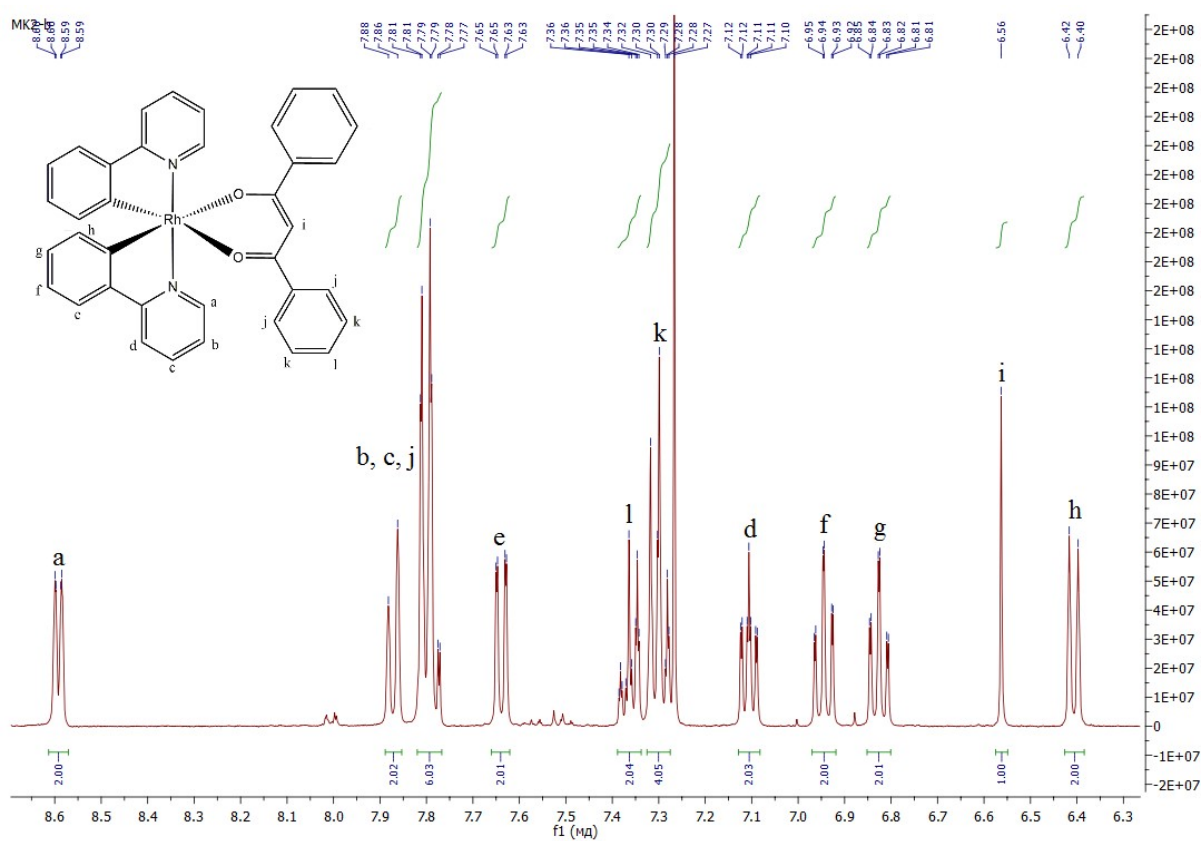

Figure S2.  $^1\text{H}$  NMR spectrum of Rh1 (400 MHz, 298K,  $\text{CDCl}_3$ ).

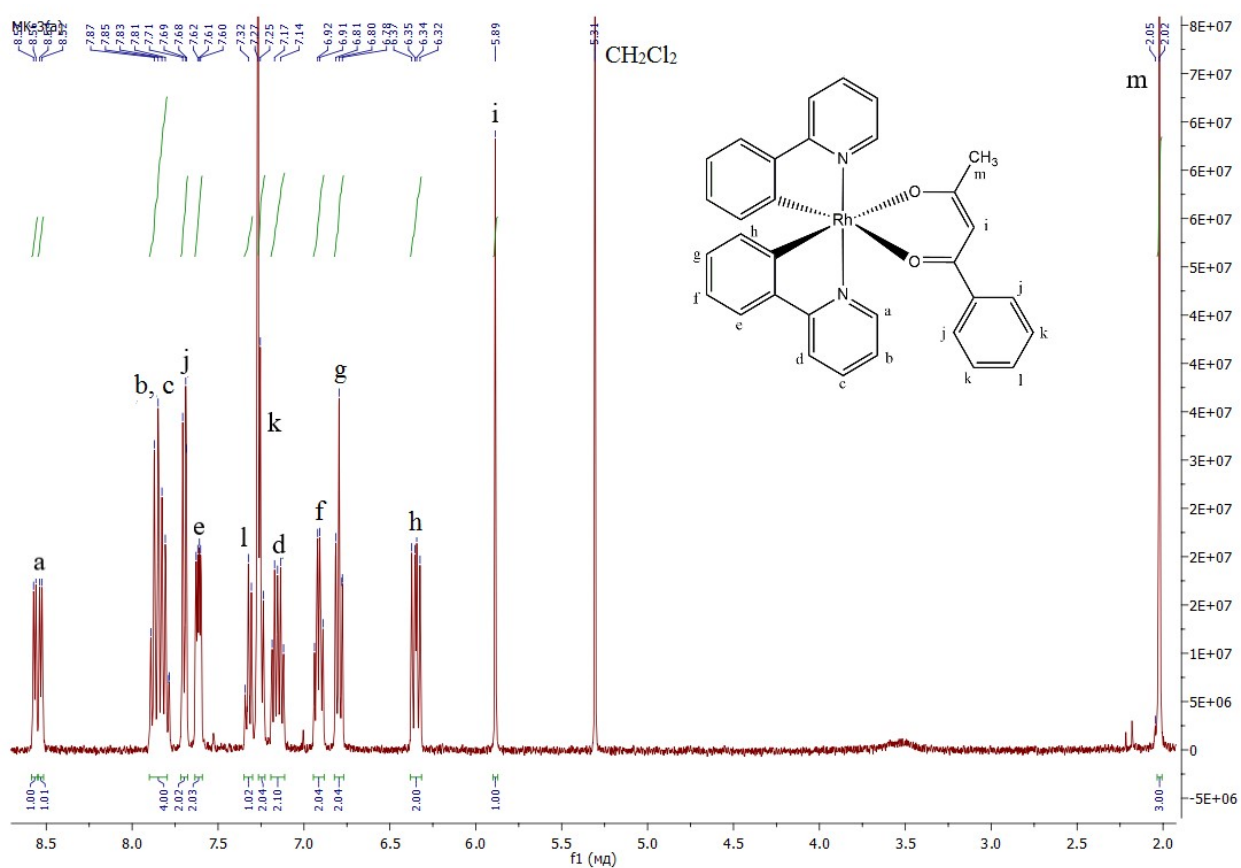

Figure S3.  $^1\text{H}$  NMR spectrum of **Rh2** (400 MHz, 298K,  $\text{CDCl}_3$ ).

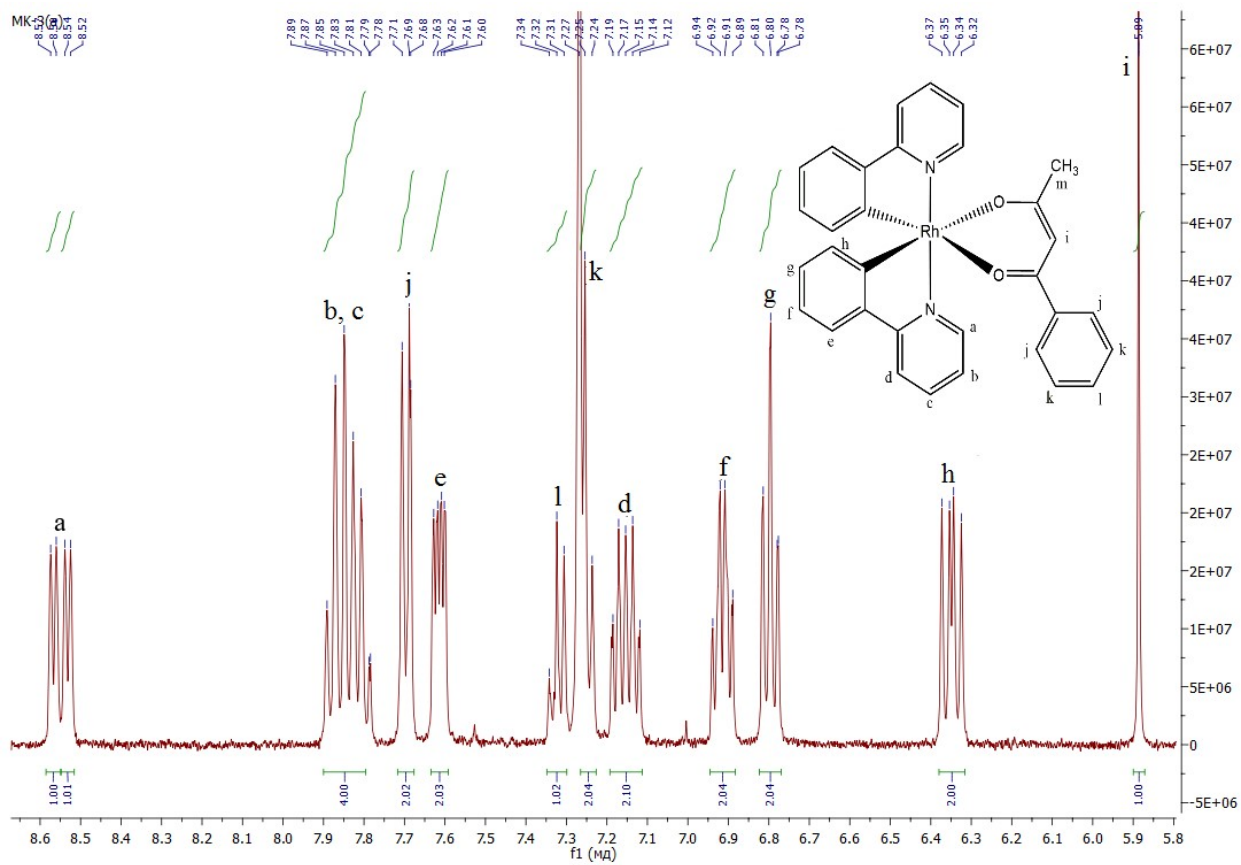

Figure S4. The aromatic part of  $^1\text{H}$  NMR spectrum of **Rh2** (400 MHz, 298K,  $\text{CDCl}_3$ ).



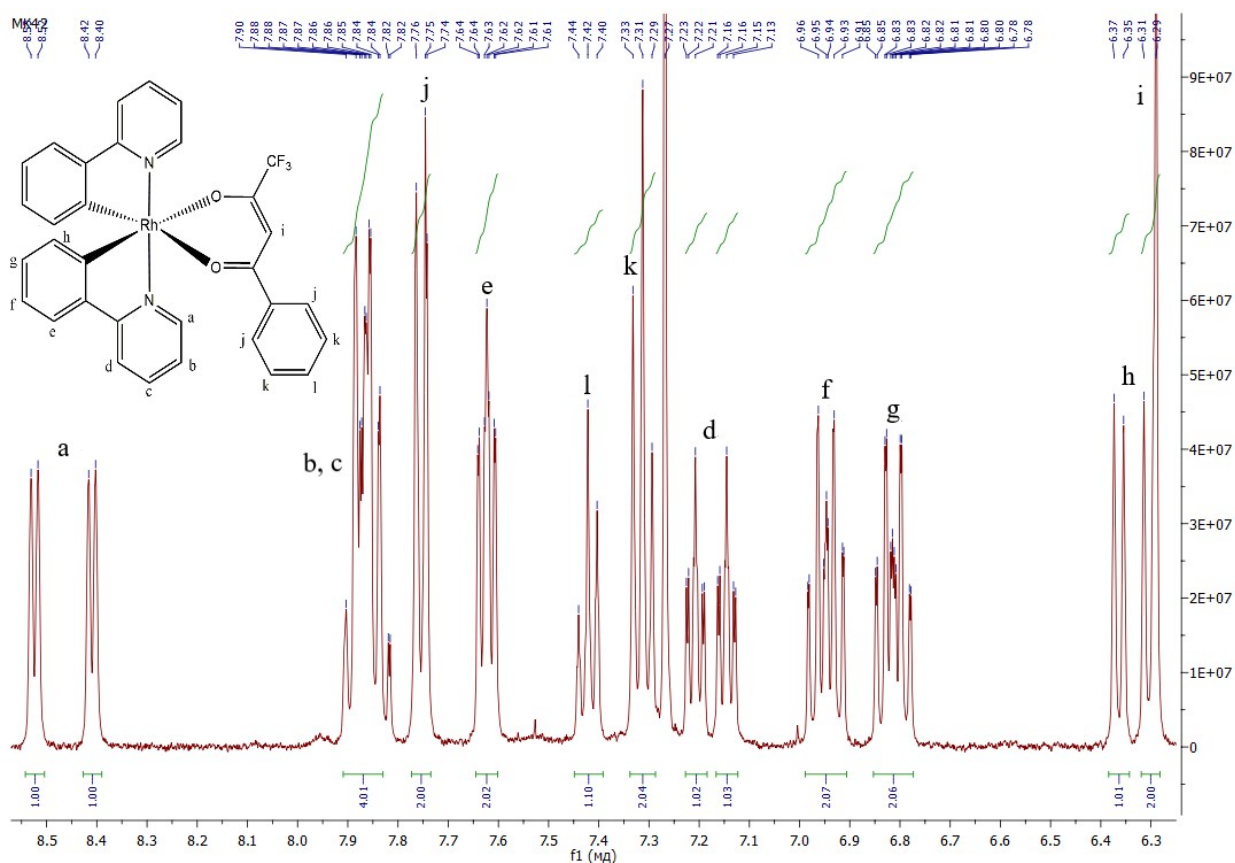

Figure S5.  $^1\text{H}$  NMR spectrum of Rh3 (400 MHz, 298K,  $\text{CDCl}_3$ ).

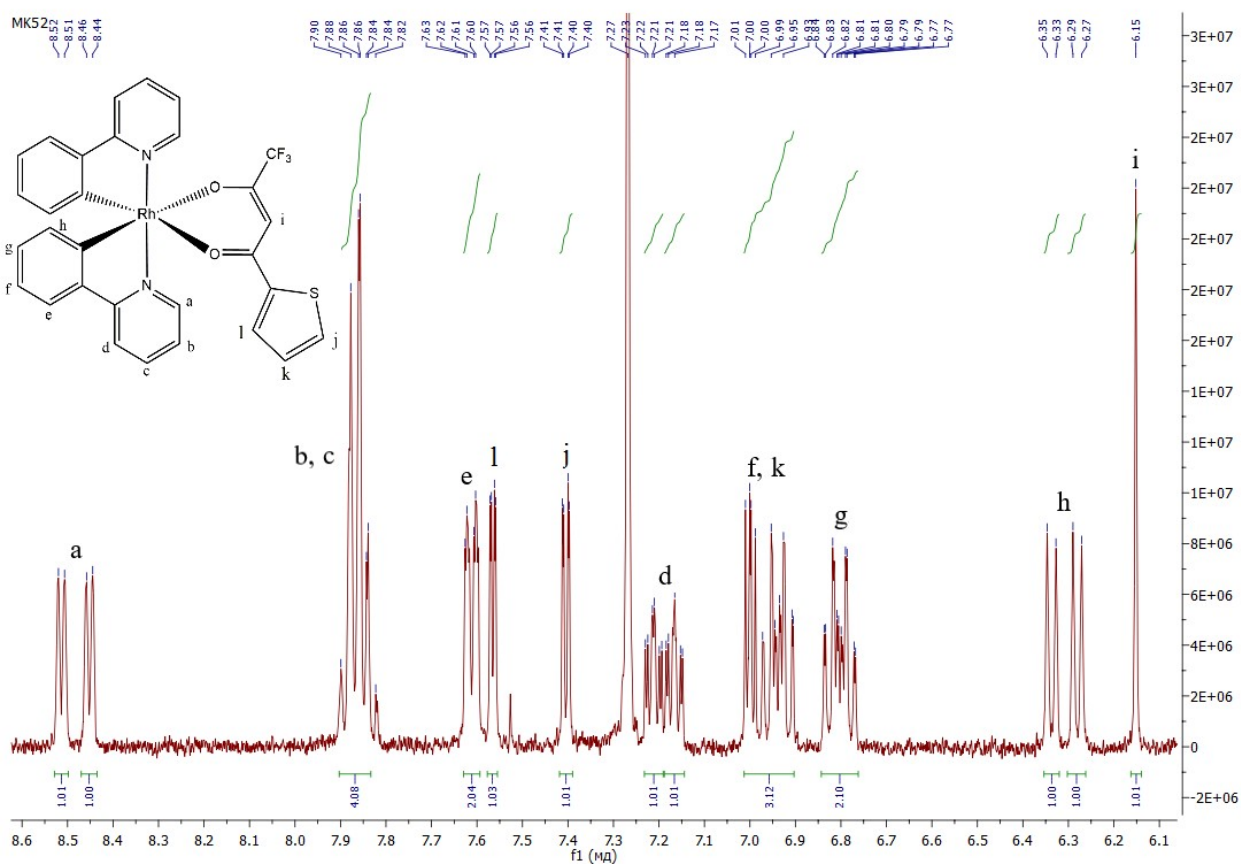

Figure S6.  $^1\text{H}$  NMR spectrum of Rh4 (400 MHz, 298K,  $\text{CDCl}_3$ ).

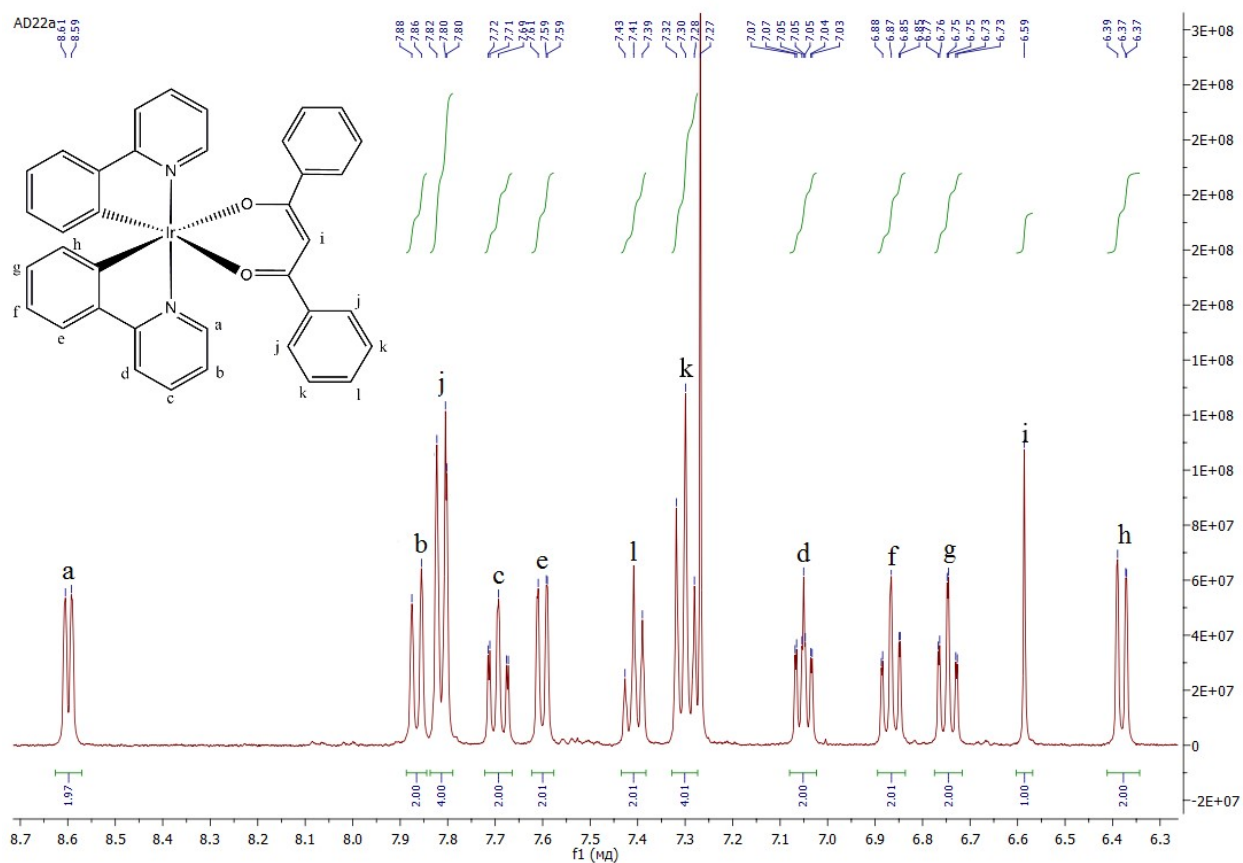

**Figure S7.**  $^1\text{H}$  NMR spectrum of **Ir1** (400 MHz, 298K,  $\text{CDCl}_3$ ).

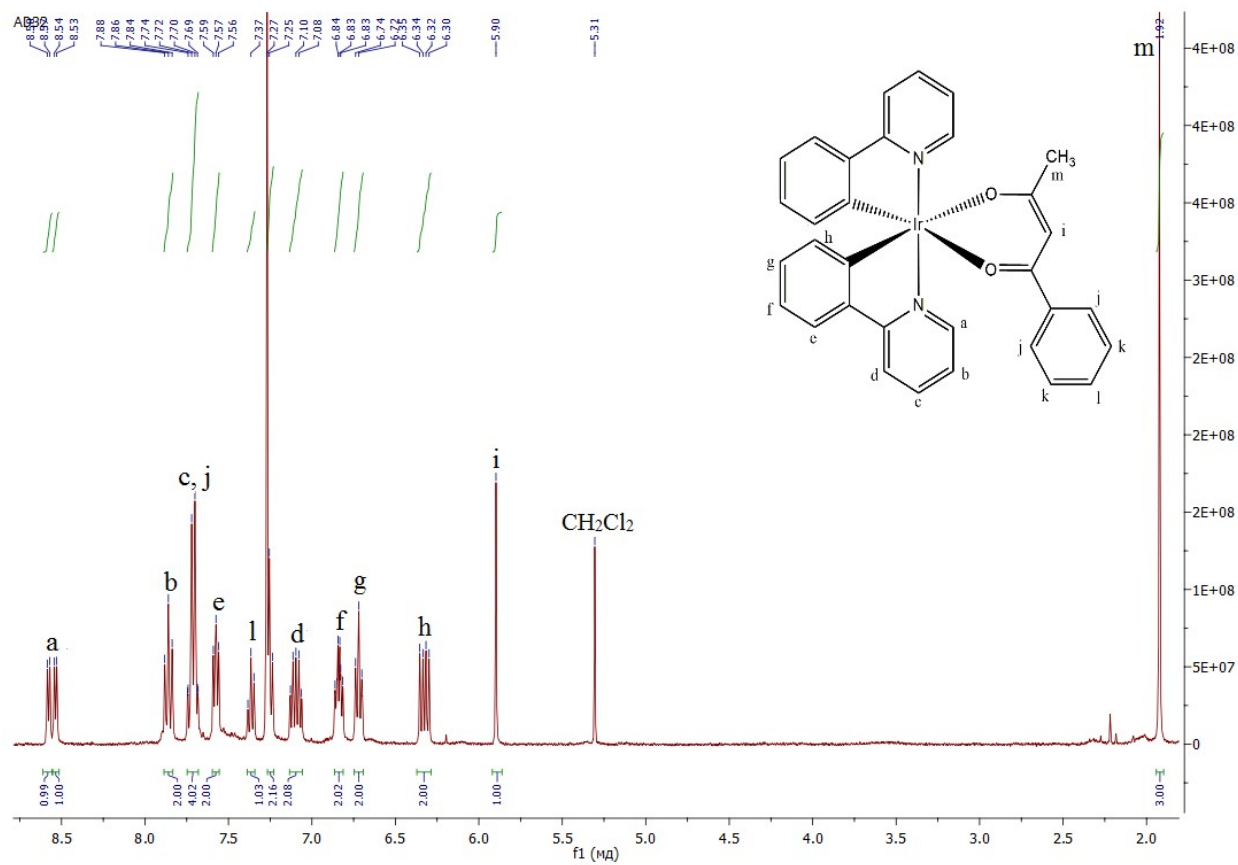

**Figure S8.**  $^1\text{H}$  NMR spectrum of **Ir2** (400 MHz, 298K,  $\text{CDCl}_3$ ).

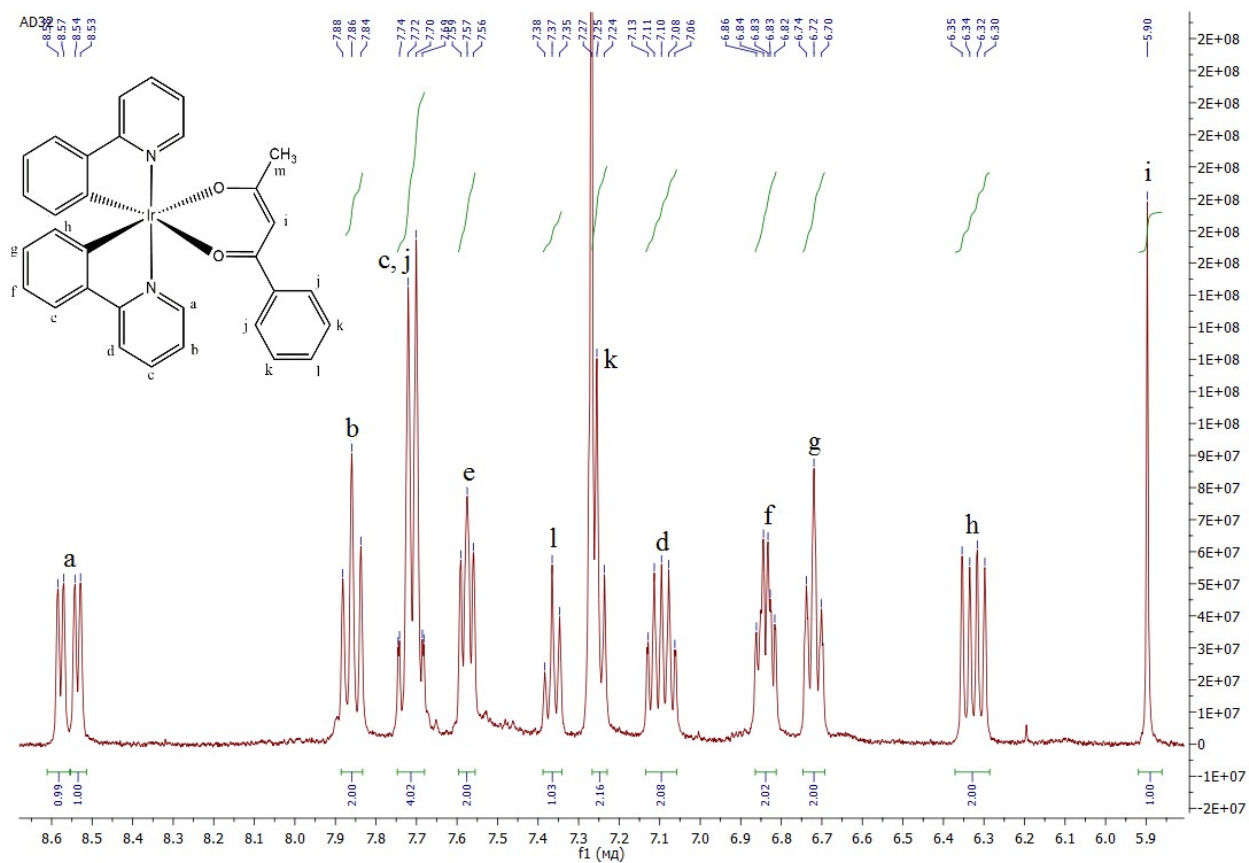

**Figure S9.** The aromatic part of  $^1\text{H}$  NMR spectrum of **Ir2** (400 MHz, 298K,  $\text{CDCl}_3$ ).

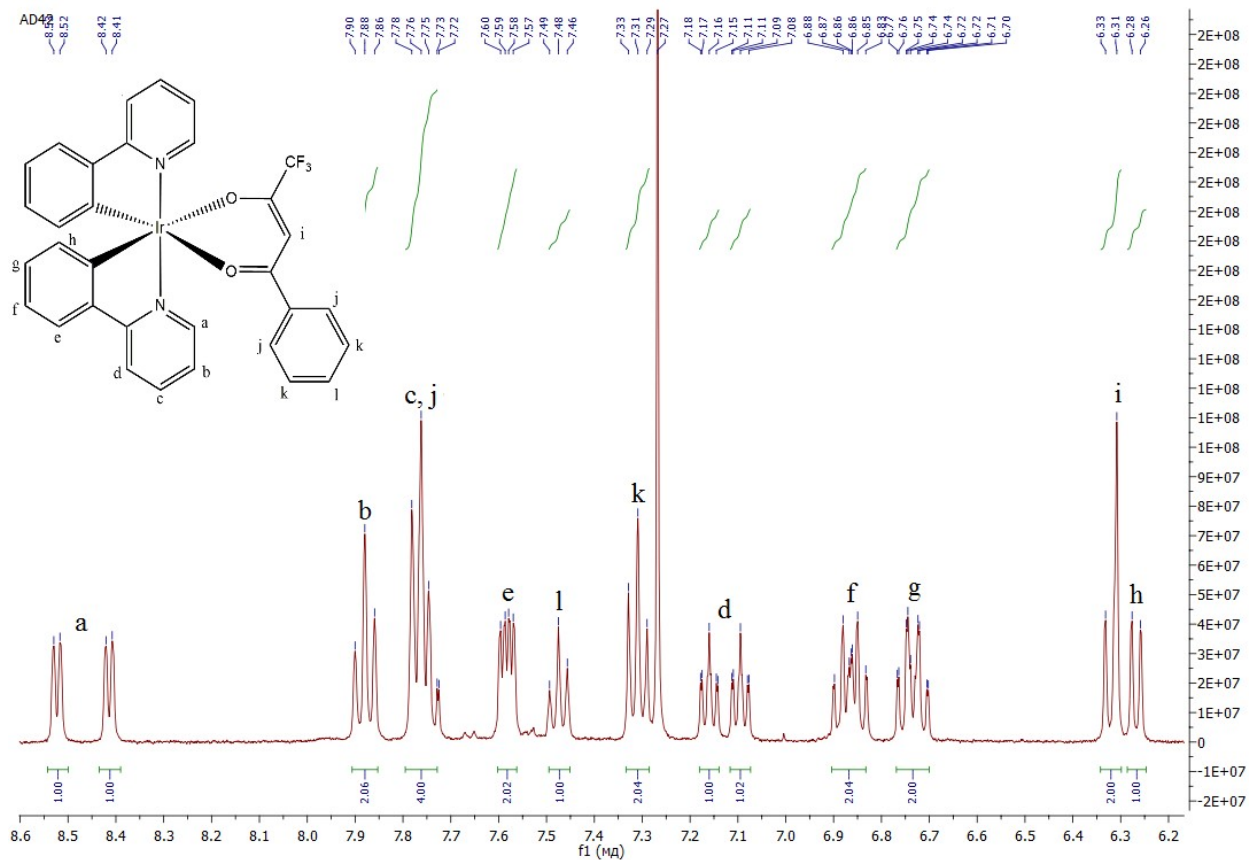

**Figure S10.**  $^1\text{H}$  NMR spectrum of **Ir3** (400 MHz, 298K,  $\text{CDCl}_3$ ).

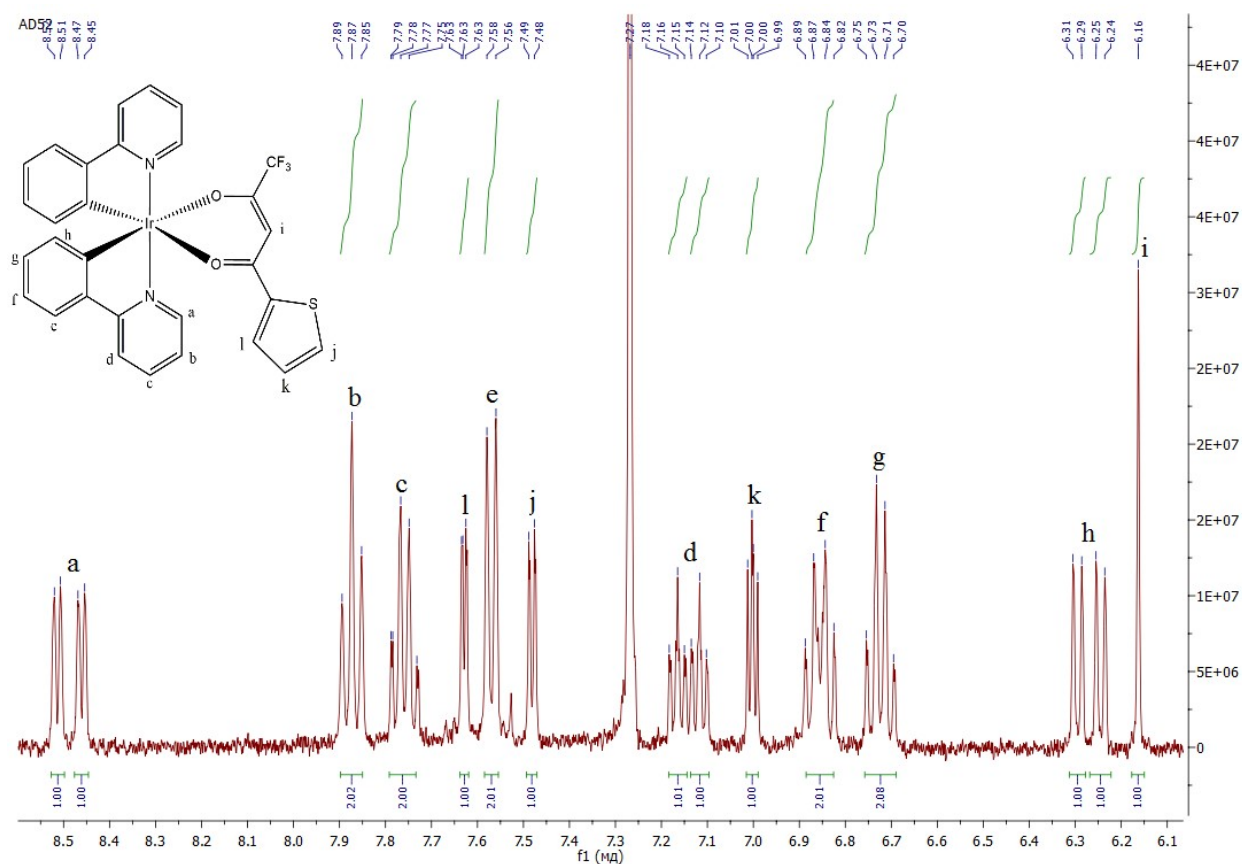

**Figure S11.**  $^1\text{H}$  NMR spectrum of **Ir4** (400 MHz, 298K,  $\text{CDCl}_3$ ).

**Table S1.** HRMS data for complexes.

| Compound   | $[\text{M}(\text{ppy})_2]^+$ |          | $[\text{M}(\text{ppy})_2\text{CH}_3\text{CN}]^+$ |          | $[\text{M}(\text{ppy})_2(\text{O}^-\text{O})+\text{H}]^+$ |          |
|------------|------------------------------|----------|--------------------------------------------------|----------|-----------------------------------------------------------|----------|
|            | Calcd                        | Found    | Calcd                                            | Found    | Calcd                                                     | Found    |
| <b>Rh1</b> | 411.0369                     | 411.0374 | 452.0634                                         | 452.0633 | 635.1201                                                  | 635.1194 |
| <b>Rh2</b> |                              | 411.0367 |                                                  | 452.0627 | 572.0971                                                  | 572.0963 |
| <b>Rh3</b> |                              | 411.0364 |                                                  | 452.0626 | 626.0688                                                  | 626.0682 |
| <b>Rh4</b> |                              | 411.0367 |                                                  | 452.0627 | 632.0253                                                  | 632.0243 |
| <b>Ir1</b> | 501.0943                     | 501.0941 | 542.1208                                         | 542.1207 | 724.1699                                                  | 724.1700 |
| <b>Ir2</b> |                              | 501.0936 |                                                  | 542.1201 | 662.1542                                                  | 662.1540 |
| <b>Ir3</b> |                              | 501.0941 |                                                  | 542.1206 | 716.1259                                                  | 716.1257 |
| <b>Ir4</b> |                              | 501.0939 |                                                  | 542.1206 | 722.0821                                                  | 722.0822 |

+TOF MS: 1.2744 to 1.8046 min from Sample 18 (MK2) of 28\_05\_21.wiff different calibrations (DuoSpray ())

Max. 2.7e4 cps

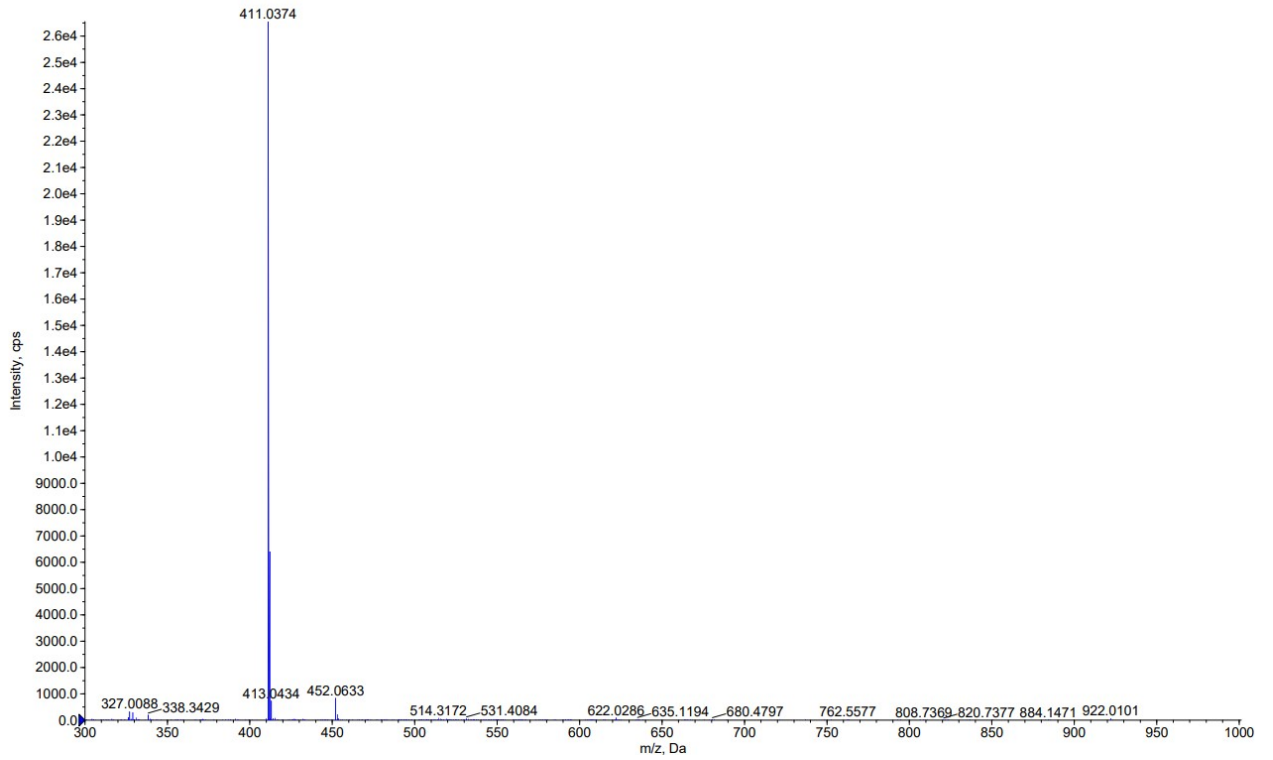

Figure S12. High-resolution mass spectrum of Rh1.

+TOF MS: 1.2744 to 1.8046 min from Sample 18 (MK2) of 28\_05\_21.wiff different calibrations (DuoSpray ())

Max. 2.7e4 cps

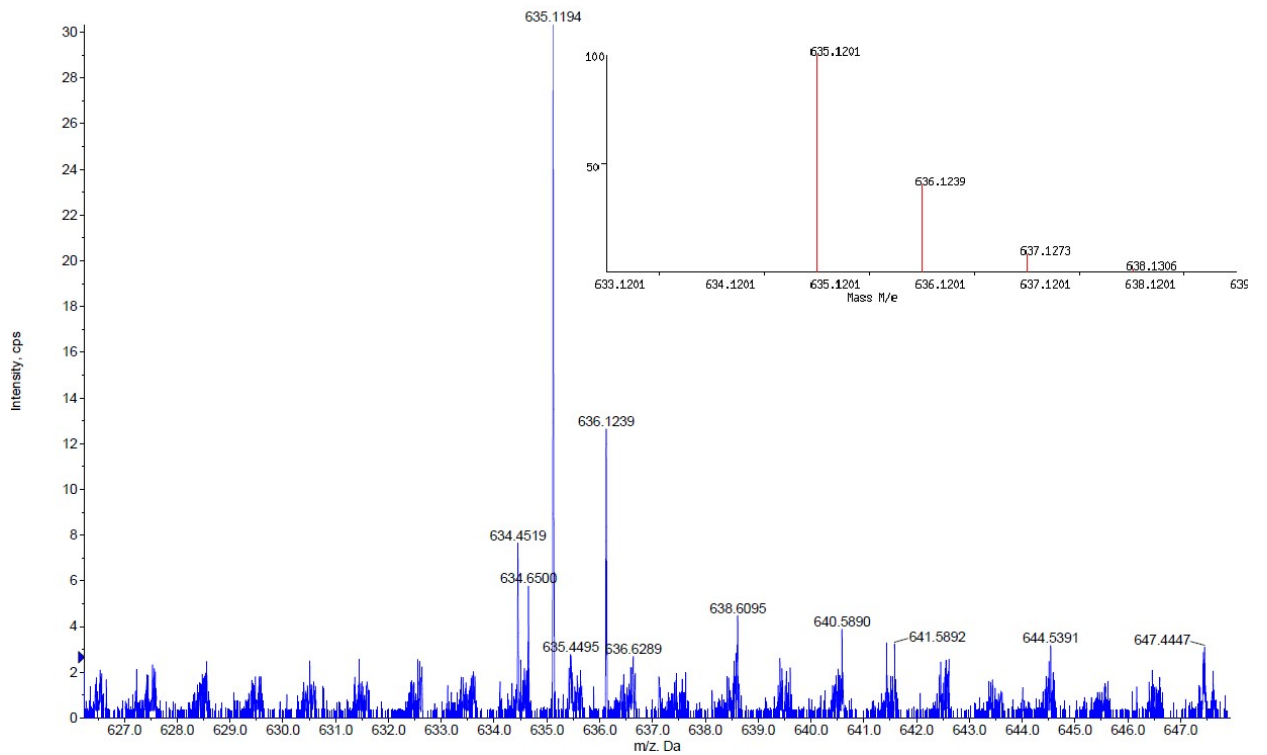

Figure S13. Fragment of high-resolution mass spectrum of Rh1.

+TOF MS: 1.1299 to 1.5206 min from Sample 24 (MK3) of 28\_05\_21.wiff different calibrations (DuoSpray (l))

Max. 4.5e4 cps.

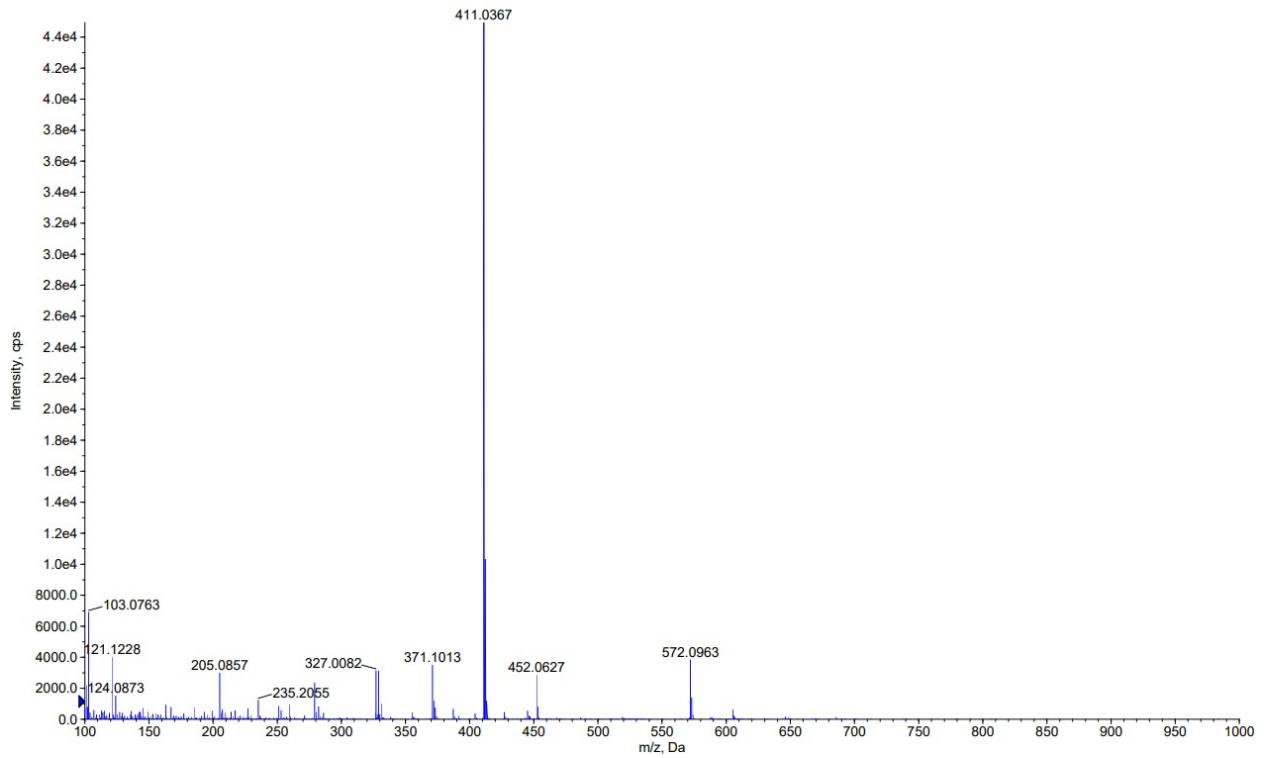

Figure S14. High-resolution mass-spectrum of Rh2.

+TOF MS: 1.1299 to 1.5206 min from Sample 24 (MK3) of 28\_05\_21.wiff different calibrations (DuoSpray (l))

Max. 4.5e4 cps.

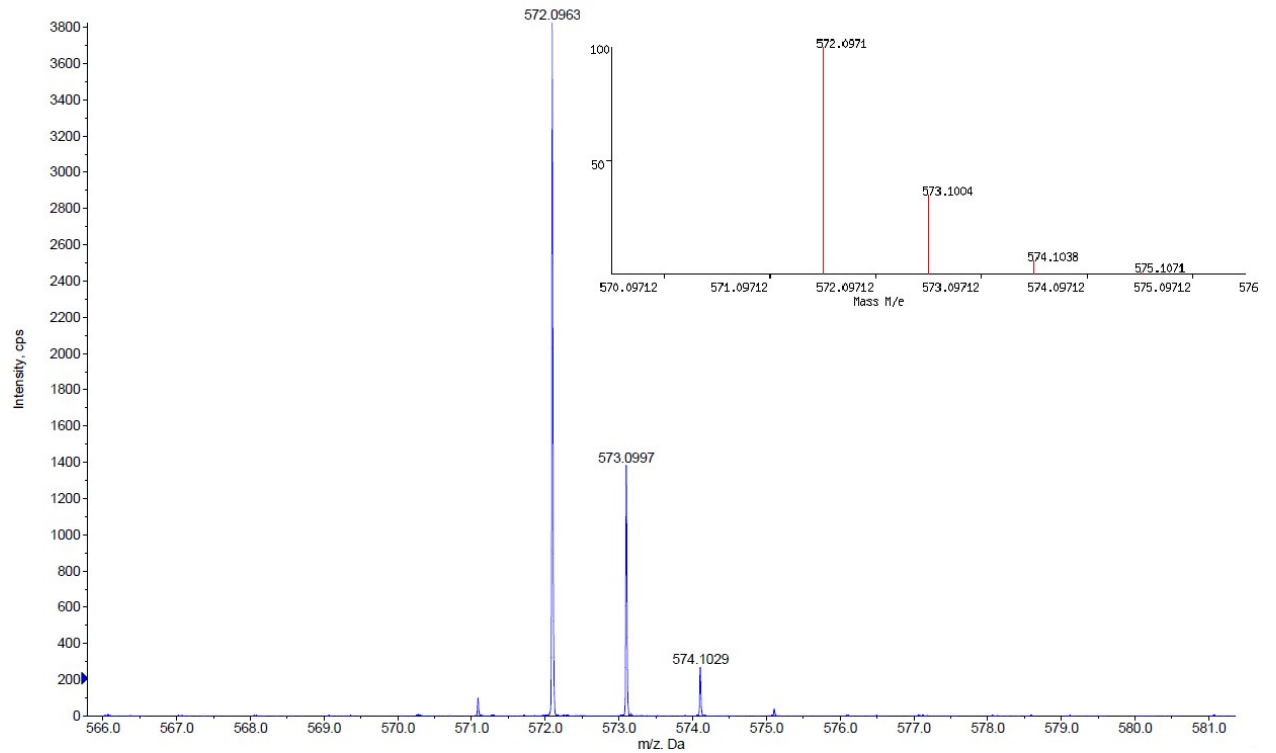

Figure S15. Fragment of high-resolution mass-spectrum of Rh2.

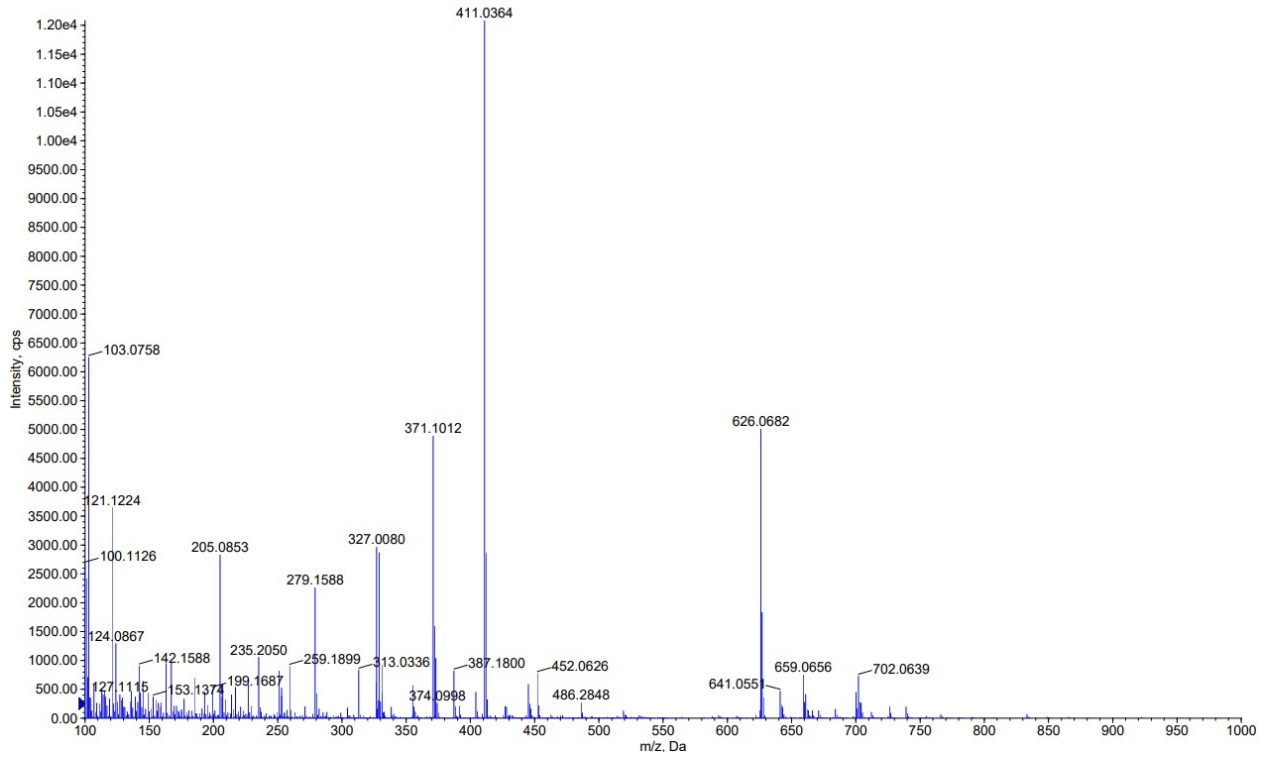

Figure S16. High-resolution mass-spectrum of Rh<sub>3</sub>.

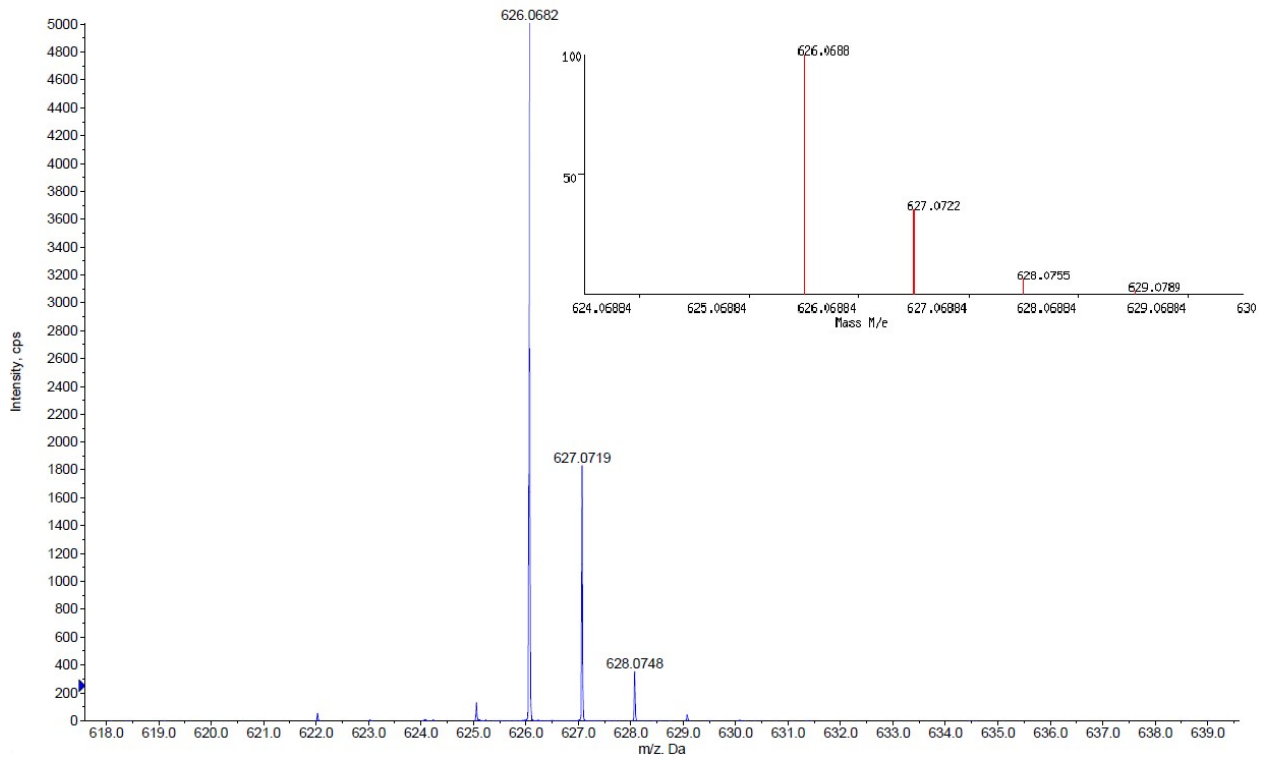

Figure S17. Fragment of high-resolution mass-spectrum of Rh<sub>3</sub>.

+TOF MS: 2.0042 to 2.2971 min from Sample 25 (MK5) of 28\_05\_21.wiff different calibrations (DuoSpray (I))

Max. 3.0e4 cps.

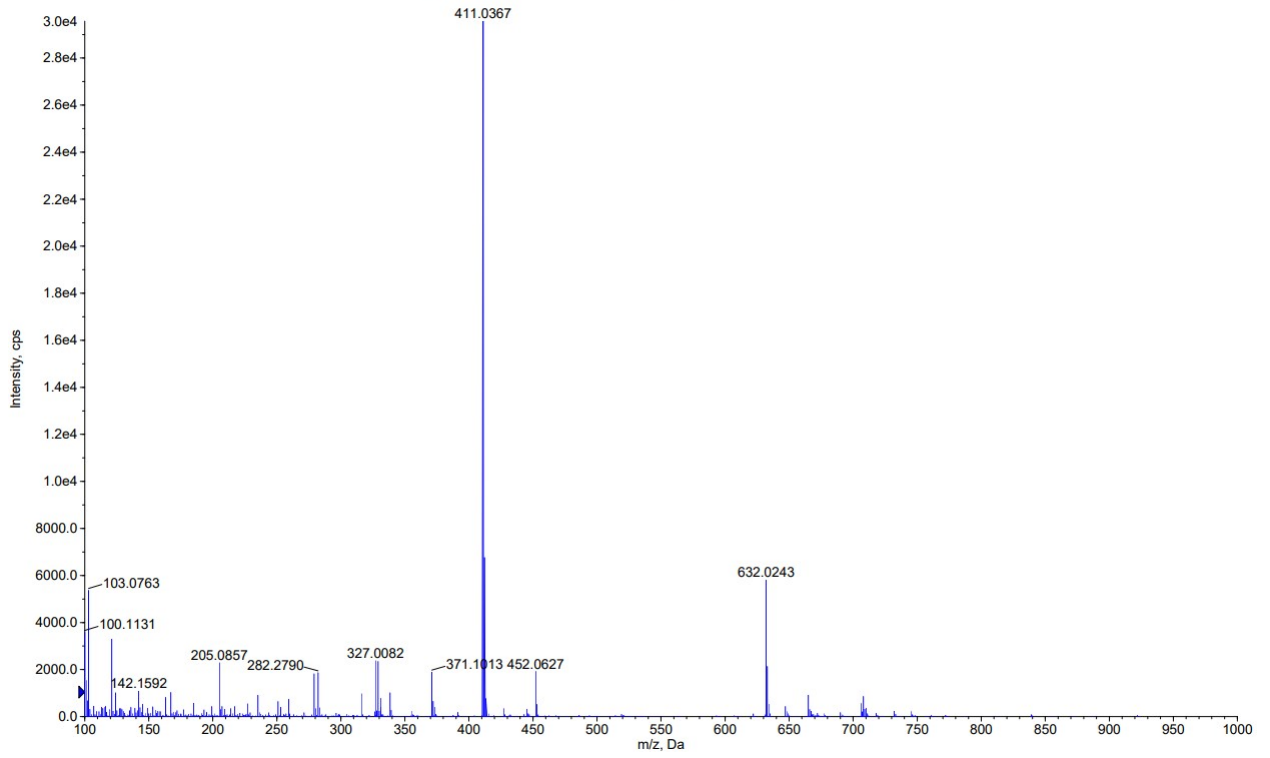

Figure S18. High-resolution mass spectrum of Rh4.

+TOF MS: 2.0042 to 2.2971 min from Sample 25 (MK5) of 28\_05\_21.wiff different calibrations (DuoSpray (I))

Max. 3.0e4 cps.

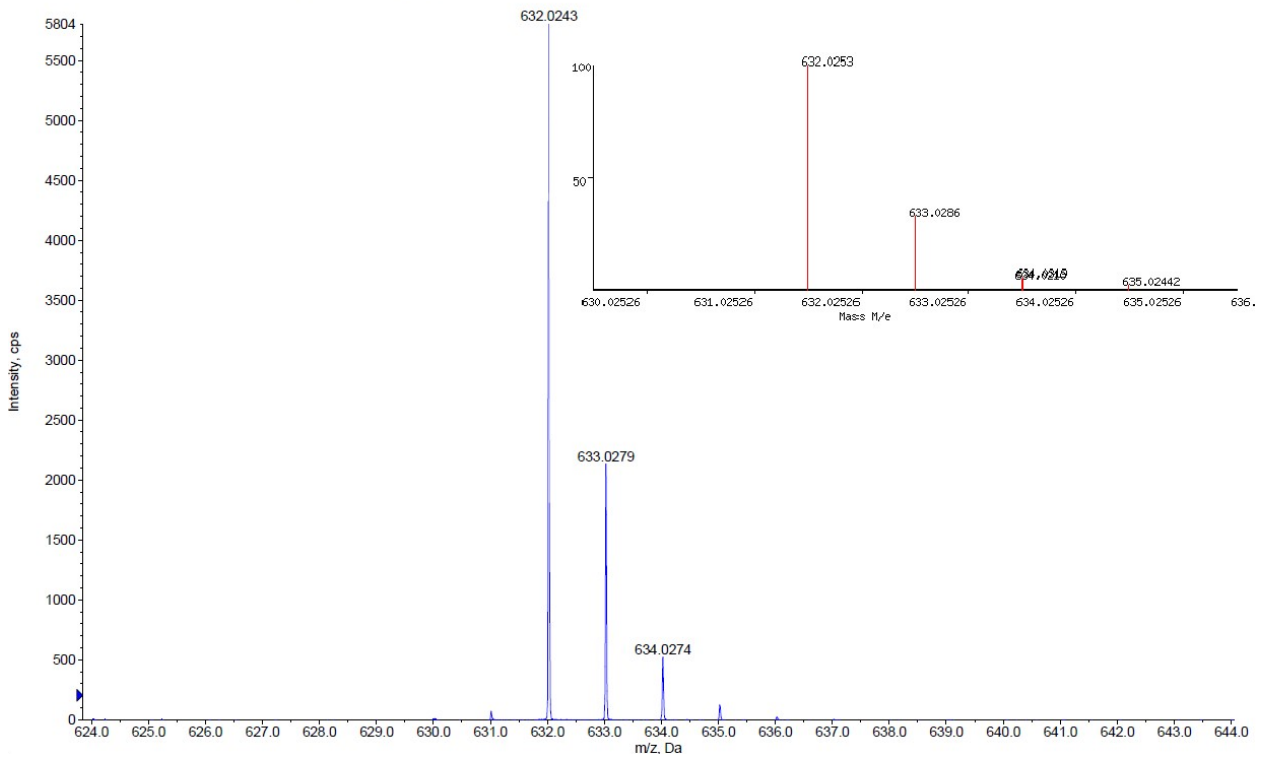

Figure S19. Fragment of high-resolution mass spectrum of Rh4.



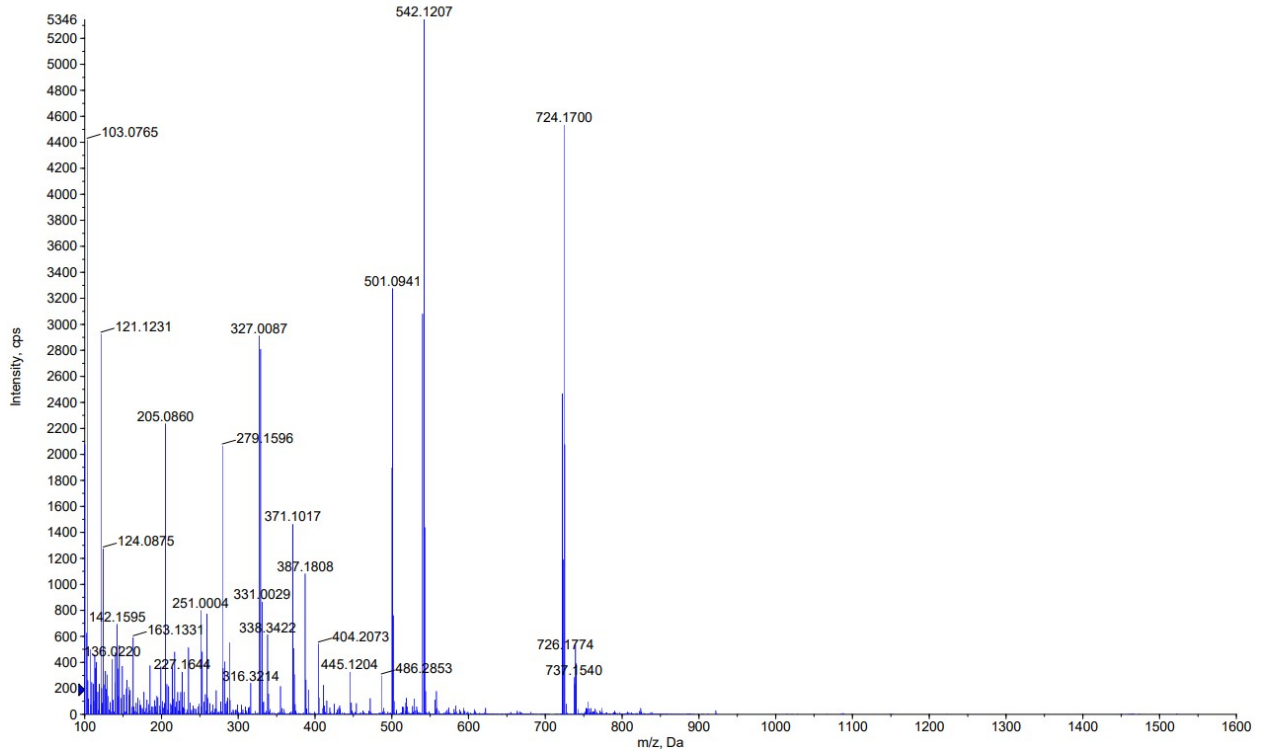

Figure S20. High-resolution mass spectrum of Ir1.

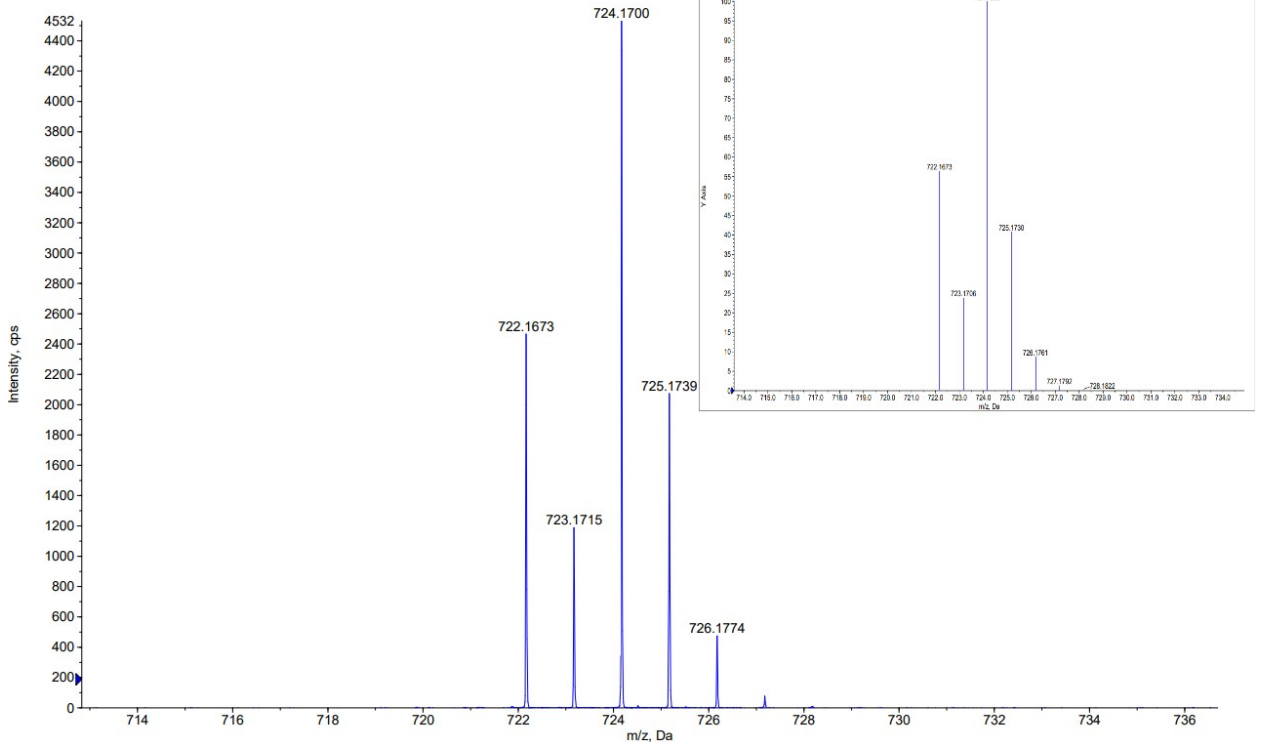

Figure S21. Fragment of high-resolution mass spectrum of Ir1.

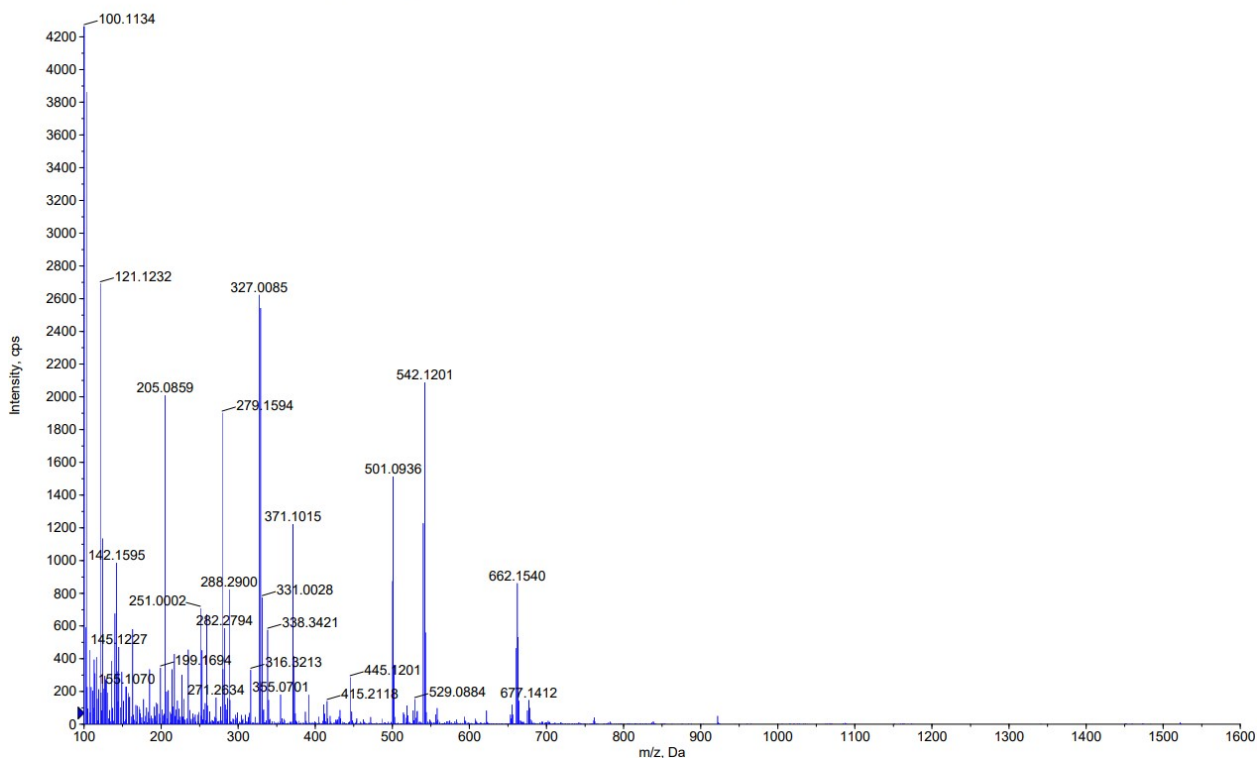

Figure S22. High-resolution mass-spectrum of Ir2.

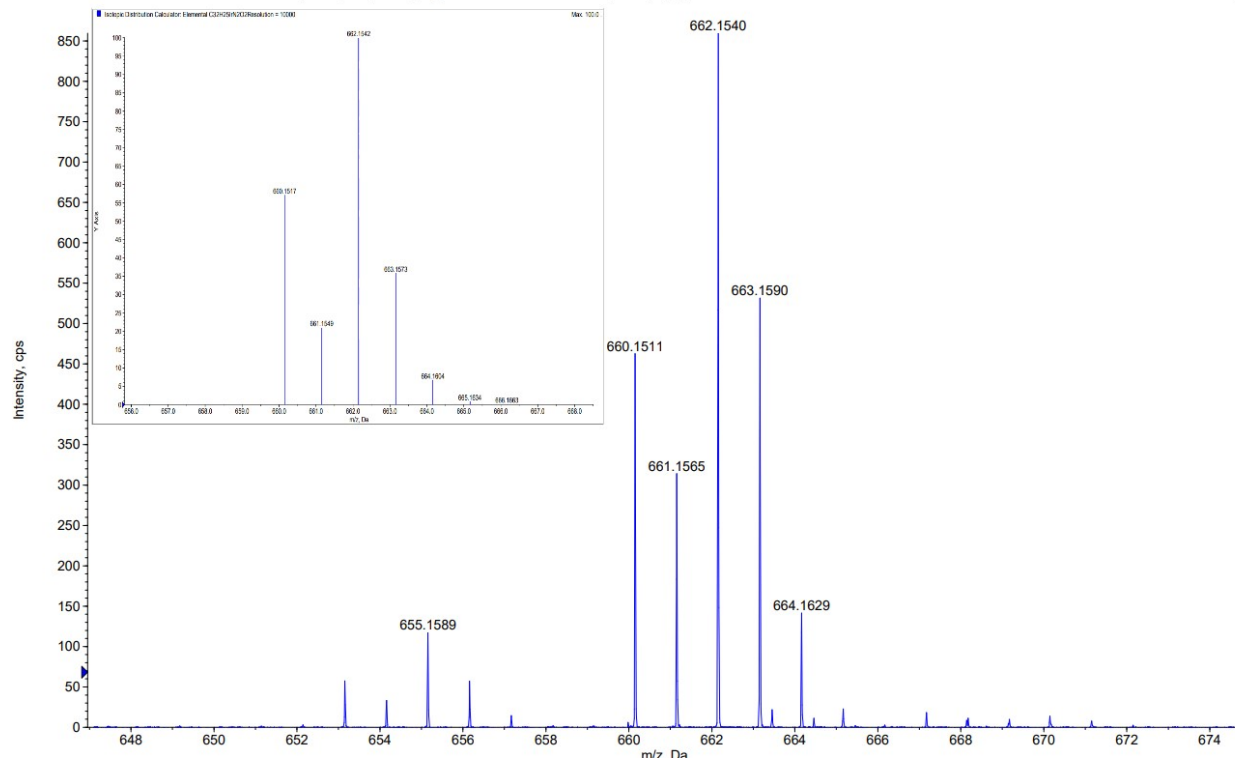

Figure S23. Fragment of high-resolution mass-spectrum of Ir2.

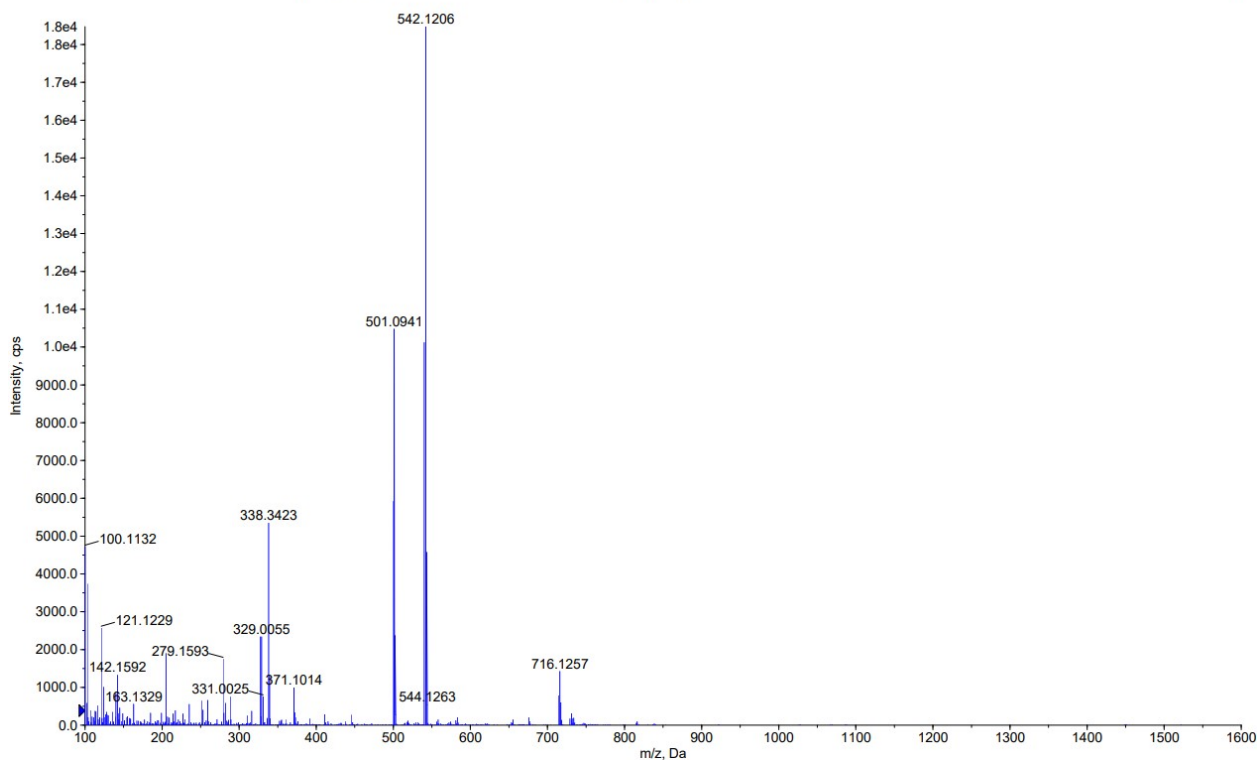

Figure S24. High-resolution mass-spectrum of Ir3.

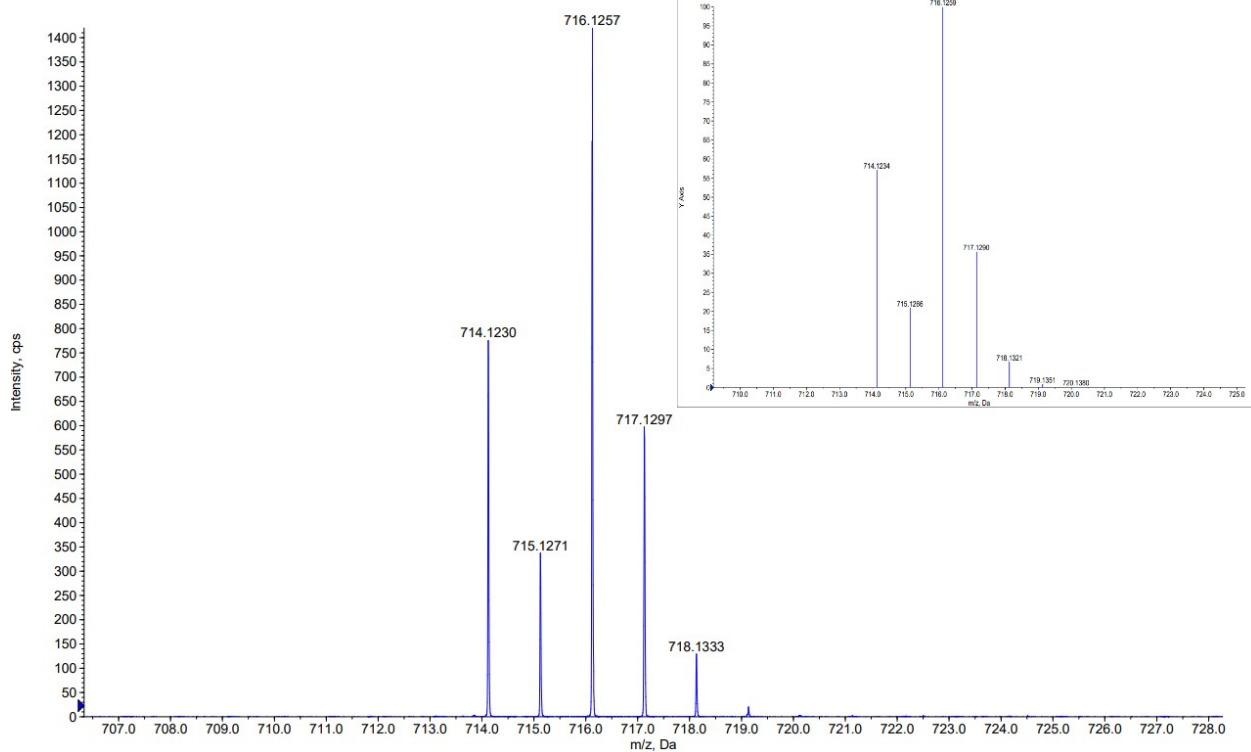

Figure S25. Fragment of high-resolution mass-spectrum of Ir3.

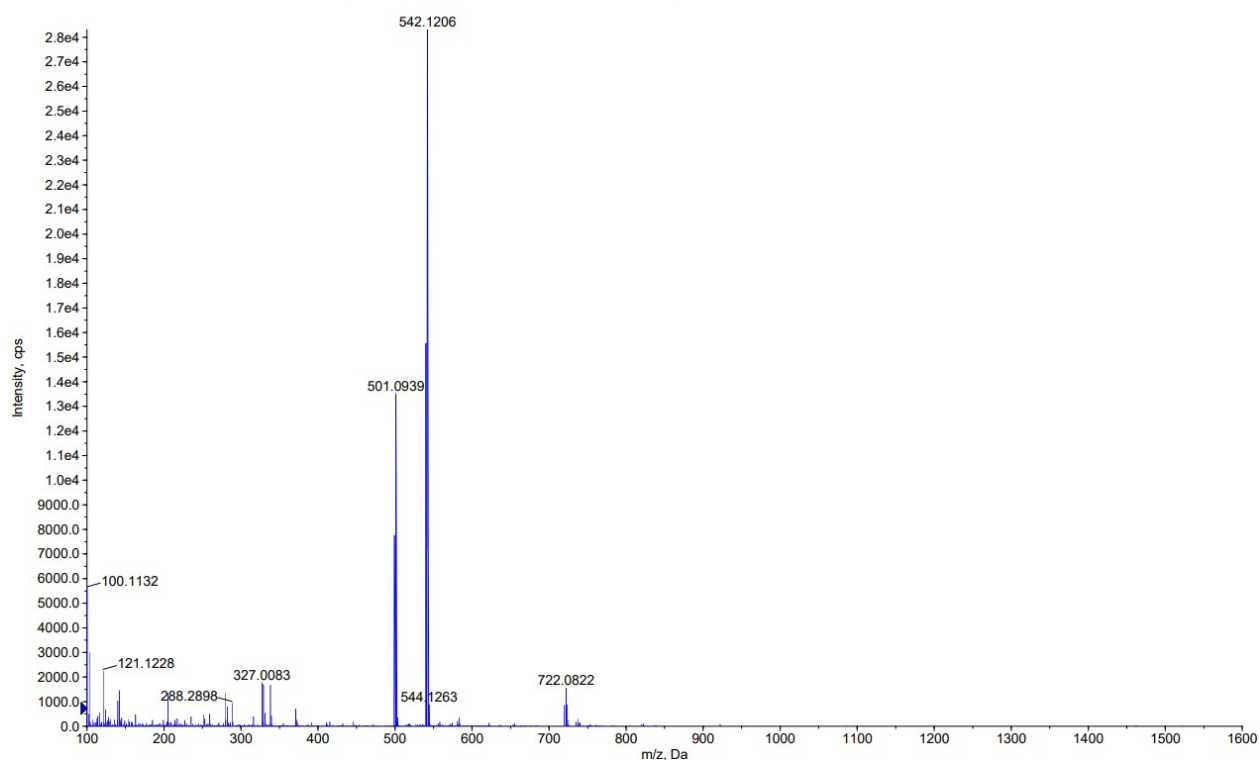

Figure S26. High-resolution mass-spectrum of Ir4.

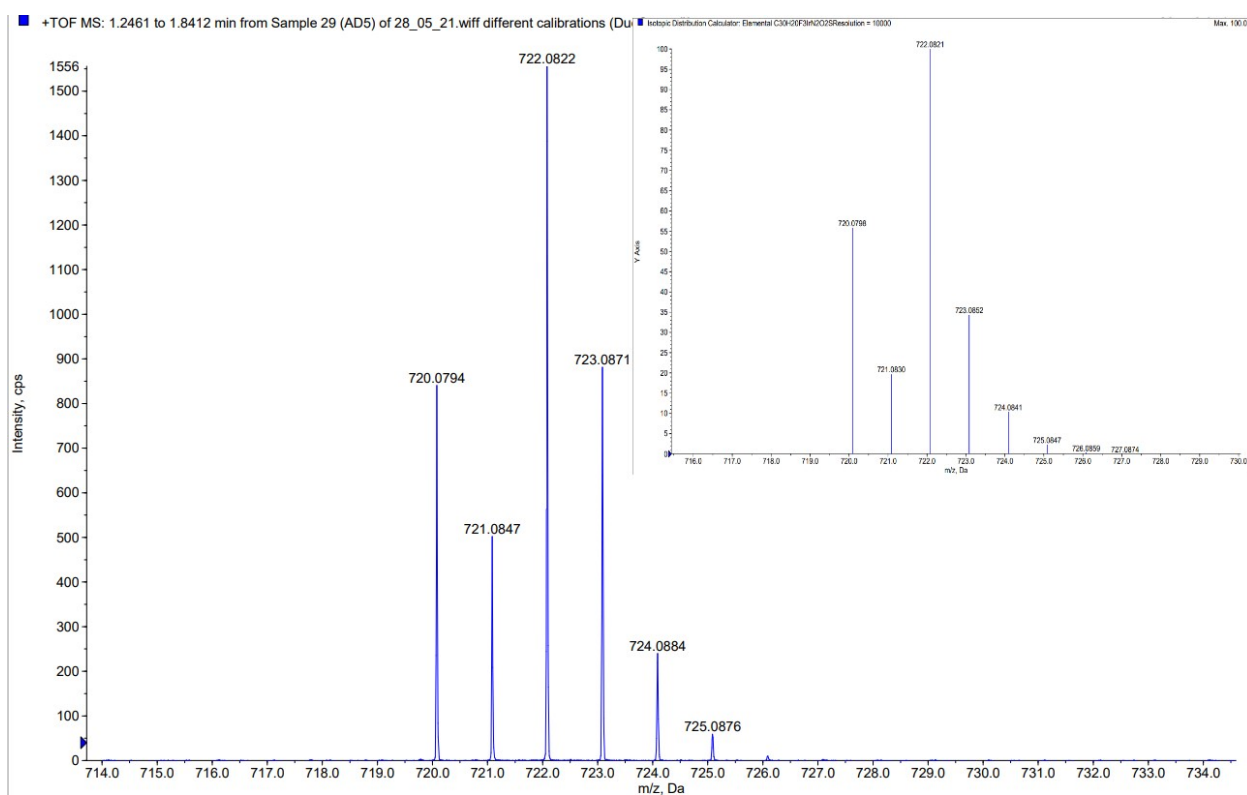

Figure S27. Fragment of high-resolution mass-spectrum of Ir4.

### 3. X-ray crystallography

Single crystals of a cyclometalated  $\mu$ -chloro-bridged rhodium(III) dimer were obtained upon slow evaporation of concentrated solutions in  $\text{CH}_2\text{Cl}_2$  or  $\text{CHCl}_3$ . Single crystals of **Rh1** – **Rh4** and **Ir2** – **Ir4** were obtained upon evaporation of solutions of the complexes in  $\text{CH}_2\text{Cl}_2$ /hexane (1/1 vol.). Crystallographic data were collected on Bruker SMART APEX II and D8 Venture diffractometers using graphite monochromatized Mo–K $\alpha$  radiation ( $\lambda = 0.71073 \text{ \AA}$ ) using a  $\omega$ -scan mode. Absorption correction based on measurements of equivalent reflections was applied [4]. The structures were solved by direct methods and refined by full matrix least-squares on  $F^2$  with anisotropic thermal parameters for all non-hydrogen atoms [5, 6]. In all structures, hydrogen atoms were placed in calculated positions and refined using a riding model. The crystal of the dimer appears as a racemic twin with the ratio of the components 0.56/0.44. In structures of b-[Rh(ppy)<sub>2</sub>Cl]<sub>2</sub> and **Rh3**, **Ir2**, **Ir3**, disordered solvent molecules were not located and their contribution was suppressed by the SQUEEZE procedure [7] which is included in the Olex2 package [8]. The phenyl ring in **Rh2**, diketone in **Rh3**, thiophene rings in **Rh4**, **Ir4**, one of the C<sup>N</sup> ligands in **Ir3** and both ppy ligands in a-[Rh(ppy)<sub>2</sub>Cl]<sub>2</sub> are disordered over two positions with approximately equal occupancies. CCDC 2093179–2093187 contain the supplementary crystallographic data for **Ir2** – **Ir4**, a-[Rh(ppy)<sub>2</sub>Cl]<sub>2</sub>, b-[Rh(ppy)<sub>2</sub>Cl]<sub>2</sub>, **Rh1** – **Rh4**, respectively. These data can be obtained free of charge from The Cambridge Crystallographic Data Centre via [www.ccdc.cam.ac.uk/data\\_request/cif](http://www.ccdc.cam.ac.uk/data_request/cif).

**Table S2.** Details of the X-ray crystal data collection and structure refinement for complexes **Rh1 – Rh4, Ir2 – Ir4, [Rh(ppy)<sub>2</sub>Cl]<sub>2</sub>.**

|                                                     | <b>Rh1</b>                                                           | <b>Rh2</b>                                                       | <b>Rh3</b>                                                                      | <b>Rh4</b>                                                                       | <b>Ir2</b>                                                      | <b>Ir3</b>                                                                     | <b>Ir4</b>                                                                       | <b>a-[Rh(ppy)<sub>2</sub>Cl]<sub>2</sub></b>                                   | <b>b-[Rh(ppy)<sub>2</sub>Cl]<sub>2</sub></b>                                   |
|-----------------------------------------------------|----------------------------------------------------------------------|------------------------------------------------------------------|---------------------------------------------------------------------------------|----------------------------------------------------------------------------------|-----------------------------------------------------------------|--------------------------------------------------------------------------------|----------------------------------------------------------------------------------|--------------------------------------------------------------------------------|--------------------------------------------------------------------------------|
| Empirical formula                                   | C <sub>37.5</sub> H <sub>28</sub> ClN <sub>2</sub> O <sub>2</sub> Rh | C <sub>32</sub> H <sub>25</sub> N <sub>2</sub> O <sub>2</sub> Rh | C <sub>32</sub> H <sub>22</sub> F <sub>3</sub> N <sub>2</sub> O <sub>2</sub> Rh | C <sub>30</sub> H <sub>20</sub> F <sub>3</sub> N <sub>2</sub> O <sub>2</sub> RhS | C <sub>32</sub> H <sub>25</sub> IrN <sub>2</sub> O <sub>2</sub> | C <sub>32</sub> H <sub>22</sub> F <sub>3</sub> IrN <sub>2</sub> O <sub>2</sub> | C <sub>30</sub> H <sub>20</sub> F <sub>3</sub> IrN <sub>2</sub> O <sub>2</sub> S | C <sub>44</sub> H <sub>32</sub> Cl <sub>2</sub> N <sub>4</sub> Rh <sub>2</sub> | C <sub>44</sub> H <sub>32</sub> Cl <sub>2</sub> N <sub>4</sub> Rh <sub>2</sub> |
| M <sub>w</sub>                                      | 676.98                                                               | 572.45                                                           | 626.42                                                                          | 632.45                                                                           | 661.74                                                          | 715.71                                                                         | 721.74                                                                           | 893.45                                                                         | 893.45                                                                         |
| Temperature (K)                                     | 100                                                                  | 100                                                              | 150                                                                             | 150                                                                              | 100                                                             | 150                                                                            | 100                                                                              | 100.15                                                                         | 100                                                                            |
| Size (mm)                                           | 0.32x0.18x0.04                                                       | 0.13x0.08x0.01                                                   | 0.18x0.05x0.03                                                                  | 0.21x0.15x0.05                                                                   | 0.16x0.12x0.09                                                  | 0.23x0.15x0.12                                                                 | 0.22x0.14x0.11                                                                   | 0.12x0.1x0.01                                                                  | 0.22x0.2x0.08                                                                  |
| Cryst. system                                       | triclinic                                                            | monoclinic                                                       | triclinic                                                                       | monoclinic                                                                       | monoclinic                                                      | triclinic                                                                      | monoclinic                                                                       | monoclinic                                                                     | monoclinic                                                                     |
| Space group                                         | P-1                                                                  | P2 <sub>1</sub> /n                                               | P-1                                                                             | P2 <sub>1</sub> /c                                                               | P2 <sub>1</sub> /n                                              | P-1                                                                            | P2 <sub>1</sub> /c                                                               | Pc                                                                             | P2 <sub>1</sub> /n                                                             |
| <i>a</i> (Å)                                        | 10.5699(2)                                                           | 10.0427(11)                                                      | 11.4135(4)                                                                      | 15.4022(5)                                                                       | 10.1004(5)                                                      | 11.4446(6)                                                                     | 15.3589(12)                                                                      | 12.7993(8)                                                                     | 13.4265(12)                                                                    |
| <i>b</i> (Å)                                        | 11.7403(2)                                                           | 23.901(2)                                                        | 11.8344(4)                                                                      | 20.3286(6)                                                                       | 23.8644(13)                                                     | 11.7077(6)                                                                     | 20.2331(16)                                                                      | 17.6551(10)                                                                    | 13.9065(11)                                                                    |
| <i>c</i> (Å)                                        | 12.2502(2)                                                           | 12.1579(12)                                                      | 13.4479(5)                                                                      | 17.4956(6)                                                                       | 12.1714(6)                                                      | 13.0847(7)                                                                     | 17.6076(15)                                                                      | 16.4434(10)                                                                    | 24.1630(18)                                                                    |
| <i>α</i> (°)                                        | 92.2610(10)                                                          | 90                                                               | 70.7650(10)                                                                     | 90                                                                               | 90                                                              | 71.158(2)                                                                      | 90                                                                               | 90                                                                             | 90                                                                             |
| <i>β</i> (°)                                        | 93.1600(10)                                                          | 100.002(4)                                                       | 72.2520(10)                                                                     | 112.9990(10)                                                                     | 100.722(2)                                                      | 75.027(2)                                                                      | 113.797(2)                                                                       | 108.775(2)                                                                     | 95.936(3)                                                                      |
| <i>γ</i> (°)                                        | 104.3880(10)                                                         | 90                                                               | 67.1520(10)                                                                     | 90                                                                               | 90                                                              | 67.214(2)                                                                      | 90                                                                               | 90                                                                             | 90                                                                             |
| V (Å <sup>3</sup> )                                 | 1468.03(4)                                                           | 2874.0(5)                                                        | 1547.45(10)                                                                     | 5042.5(3)                                                                        | 2882.6(3)                                                       | 1511.82(14)                                                                    | 5006.5(7)                                                                        | 3518.0(4)                                                                      | 4487.4(6)                                                                      |
| Z                                                   | 2                                                                    | 4                                                                | 2                                                                               | 8                                                                                | 4                                                               | 2                                                                              | 8                                                                                | 4                                                                              | 4                                                                              |
| <i>ρ</i> <sub>calcd</sub> (g·cm <sup>-3</sup> )     | 1.532                                                                | 1.323                                                            | 1.344                                                                           | 1.666                                                                            | 1.525                                                           | 1.572                                                                          | 1.915                                                                            | 1.687                                                                          | 1.322                                                                          |
| Abs coeff (mm <sup>-1</sup> )                       | 0.711                                                                | 0.623                                                            | 0.598                                                                           | 0.815                                                                            | 4.661                                                           | 4.464                                                                          | 5.473                                                                            | 1.130                                                                          | 0.886                                                                          |
| <i>F</i> (000)                                      | 690.0                                                                | 1168.0                                                           | 632.0                                                                           | 2544.0                                                                           | 1296.0                                                          | 696.0                                                                          | 2800.0                                                                           | 1792.0                                                                         | 1792.0                                                                         |
| <i>θ</i> range (deg)                                | 2.32 < <i>θ</i> < 30.52                                              | 2.41 < <i>θ</i> < 22.49                                          | 2.24 < <i>θ</i> < 28.83                                                         | 2.37 < <i>θ</i> < 28.29                                                          | 2.41 < <i>θ</i> < 25.25                                         | 1.95 < <i>θ</i> < 26.00                                                        | 2.35 < <i>θ</i> < 26.12                                                          | 2.615 < <i>θ</i> < 30.549                                                      | 2.22 < <i>θ</i> < 28.28                                                        |
| collected/unique rflns                              | 18790 / 8818                                                         | 29915 / 5057                                                     | 38065 / 9430                                                                    | 58653 / 12448                                                                    | 41193 / 5104                                                    | 17126 / 5881                                                                   | 71238 / 10933                                                                    | 29400 / 14878                                                                  | 44352 / 9749                                                                   |
| Completeness to <i>θ</i> (%)                        | 98.2                                                                 | 99.9                                                             | 99.6                                                                            | 99.3                                                                             | 97.7                                                            | 99.0                                                                           | 100.0                                                                            | 96.9                                                                           | 99.6                                                                           |
| no. of data/restraints/params                       | 8818 / 1 / 397                                                       | 5057 / 0 / 305                                                   | 9430 / 18 / 328                                                                 | 12448 / 22 / 691                                                                 | 5104 / 0 / 335                                                  | 5881 / 2 / 307                                                                 | 10933 / 8 / 697                                                                  | 14878 / 2 / 914                                                                | 9749 / 2 / 409                                                                 |
| Goodness of fit on <i>F</i> <sup>2</sup>            | 1.040                                                                | 1.028                                                            | 1.035                                                                           | 1.019                                                                            | 1.040                                                           | 1.054                                                                          | 1.007                                                                            | 1.373                                                                          | 1.026                                                                          |
| Final <i>R</i> indices ( <i>I</i> > 2σ( <i>I</i> )) | R <sub>1</sub> = 0.0307,<br>wR <sub>2</sub> = 0.0718                 | R <sub>1</sub> = 0.0600,<br>wR <sub>2</sub> = 0.1338             | R <sub>1</sub> = 0.0492,<br>wR <sub>2</sub> = 0.1221                            | R <sub>1</sub> = 0.0378,<br>wR <sub>2</sub> = 0.0807                             | R <sub>1</sub> = 0.0363,<br>wR <sub>2</sub> = 0.0815            | R <sub>1</sub> = 0.0342,<br>wR <sub>2</sub> = 0.0821                           | R <sub>1</sub> = 0.0360,<br>wR <sub>2</sub> = 0.0655                             | R <sub>1</sub> = 0.0765,<br>wR <sub>2</sub> = 0.2100                           | R <sub>1</sub> = 0.0552,<br>wR <sub>2</sub> = 0.1394                           |
| <i>R</i> indices (all data)                         | R <sub>1</sub> = 0.0342,<br>wR <sub>2</sub> = 0.0736                 | R <sub>1</sub> = 0.0964,<br>wR <sub>2</sub> = 0.1478             | R <sub>1</sub> = 0.0588,<br>wR <sub>2</sub> = 0.1276                            | R <sub>1</sub> = 0.0515,<br>wR <sub>2</sub> = 0.0861                             | R <sub>1</sub> = 0.0521,<br>wR <sub>2</sub> = 0.0875            | R <sub>1</sub> = 0.0386,<br>wR <sub>2</sub> = 0.0839                           | R <sub>1</sub> = 0.0669,<br>wR <sub>2</sub> = 0.0753                             | R <sub>1</sub> = 0.0986,<br>wR <sub>2</sub> = 0.2214                           | R <sub>1</sub> = 0.0746,<br>wR <sub>2</sub> = 0.1503                           |
| Largest diff peak/hole (e/Å <sup>3</sup> )          | 1.58/−1.71                                                           | 0.74/−0.84                                                       | 2.62/−0.97                                                                      | 1.53/−1.32                                                                       | 1.13/−1.57                                                      | 2.89/−1.03                                                                     | 1.65/−1.41                                                                       | 1.77/−2.22                                                                     | 1.18/−1.63                                                                     |

**Table S3.** Unit cell parameters for **Rh1 – Ir4** based on single-crystal and powder X-ray data.

| Complex    |                | a, Å        | b, Å        | c, Å        | $\alpha$ , ° | $\beta$ , °  | $\gamma$ , ° | V, Å <sup>3</sup> |
|------------|----------------|-------------|-------------|-------------|--------------|--------------|--------------|-------------------|
| <b>Rh1</b> | Powder         | 10.6568(14) | 11.7494(10) | 12.2811(15) | 91.950(17)   | 93.376(12)   | 104.516(12)  | 1484.2(4)         |
|            | Single-crystal | 10.5699(2)  | 11.7403(2)  | 12.2502(2)  | 92.2610(10)  | 93.1600(10)  | 104.3880(10) | 1468.03(4)        |
| <b>Rh2</b> | Powder         | 9.6386(15)  | 23.717(2)   | 12.1228(15) | 90           | 100.082(11)  | 90           | 2728.7(5)         |
|            | Single-crystal | 10.0427(11) | 23.901(2)   | 12.1579(12) | 90           | 100.002(4)   | 90           | 2873.9(5)         |
| <b>Rh3</b> | Powder         | 10.1895(18) | 12.9099(17) | 13.1533(19) | 70.741(10)   | 73.636(11)   | 68.389(10)   | 1493.1(7)         |
|            | Single-crystal | 11.4135(4)  | 11.8344(4)  | 13.4479(5)  | 70.7650(10)  | 72.2520(10)  | 67.1520(10)  | 1547.45(10)       |
| <b>Rh4</b> | Powder         | 14.8575(19) | 20.3343(17) | 17.9261(12) | 90           | 112.242(6)   | 90           | 5012.6(3)         |
|            | Single-crystal | 15.4022(5)  | 20.3286(6)  | 17.4956(6)  | 90           | 112.9990(10) | 90           | 5042.5(3)         |
| <b>Ir1</b> | Powder         | 10.9515(15) | 11.2465(12) | 12.4657(19) | 94.258(12)   | 91.934(14)   | 103.479(9)   | 1484.3(6)         |
|            | Single-crystal | 10.8400(7)  | 11.6907(8)  | 12.3687(9)  | 94.632(2)    | 92.666(2)    | 102.807(2)   | 1520.11(18)       |
| <b>Ir2</b> | Powder         | 10.305(3)   | 24.832(5)   | 12.097(3)   | 90           | 103.642(16)  | 90           | 3000.4(12)        |
|            | Single-crystal | 10.1004(5)  | 23.8644(13) | 12.1714(6)  | 90           | 100.722(2)   | 90           | 2882.6(3)         |
| <b>Ir3</b> | Powder         | 11.195(3)   | 12.413(3)   | 13.387(3)   | 69.299(16)   | 75.706(16)   | 67.340(12)   | 1592.5(13)        |
|            | Single-crystal | 11.4446(6)  | 11.7077(6)  | 13.0847(7)  | 71.158(2)    | 75.027(2)    | 67.214(2)    | 1511.82(14)       |
| <b>Ir4</b> | Powder         | 15.4621(11) | 20.1555(14) | 17.8598(14) | 90           | 113.436(7)   | 90           | 5102.9(7)         |
|            | Single-crystal | 15.3589(12) | 20.2331(16) | 17.6076(15) | 90           | 113.797(2)   | 90           | 5006.5(7)         |

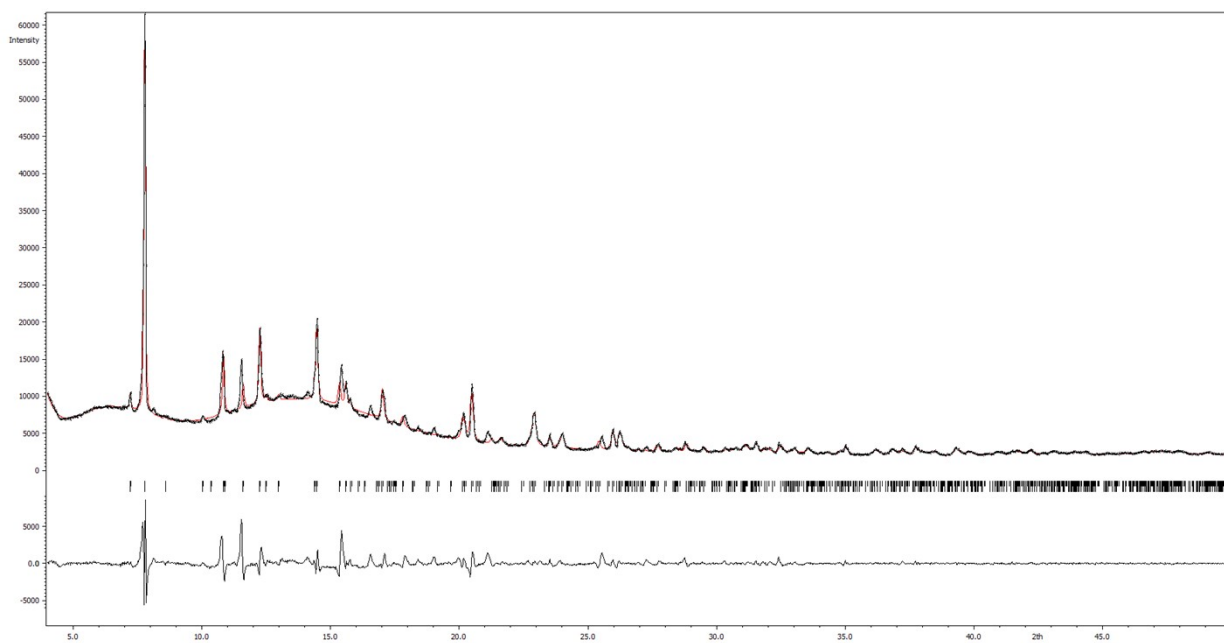

**Figure S28.** Experimental (black) and simulated (red) X-ray powder diffraction patterns of **Rh1**.

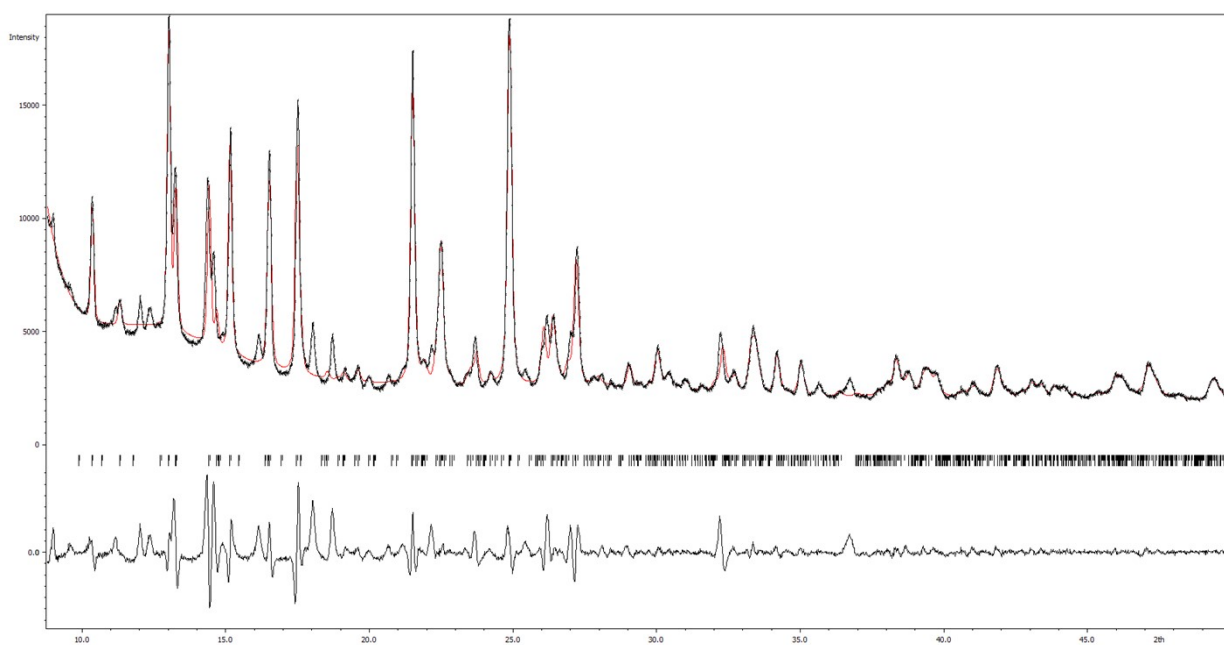

**Figure S29.** Experimental (black) and simulated (red) X-ray powder diffraction patterns of **Rh2**.



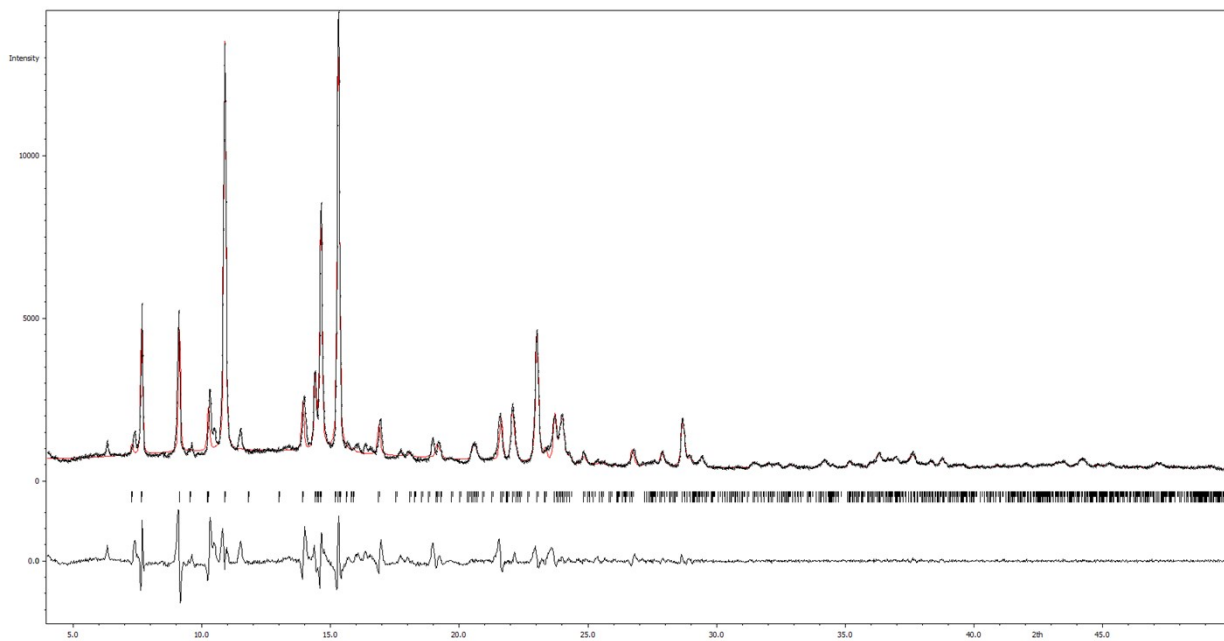

**Figure S30.** Experimental (black) and simulated (red) X-ray powder diffraction patterns of **Rh3**.

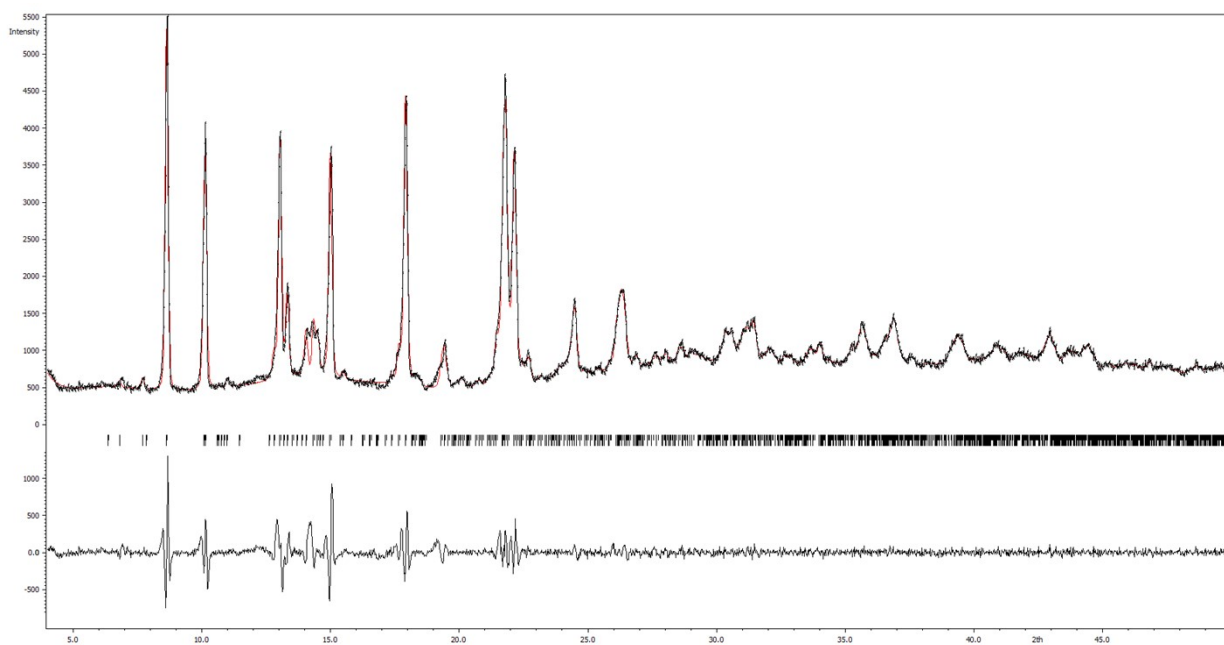

**Figure S31.** Experimental (black) and simulated (red) X-ray powder diffraction patterns of **Rh4**.

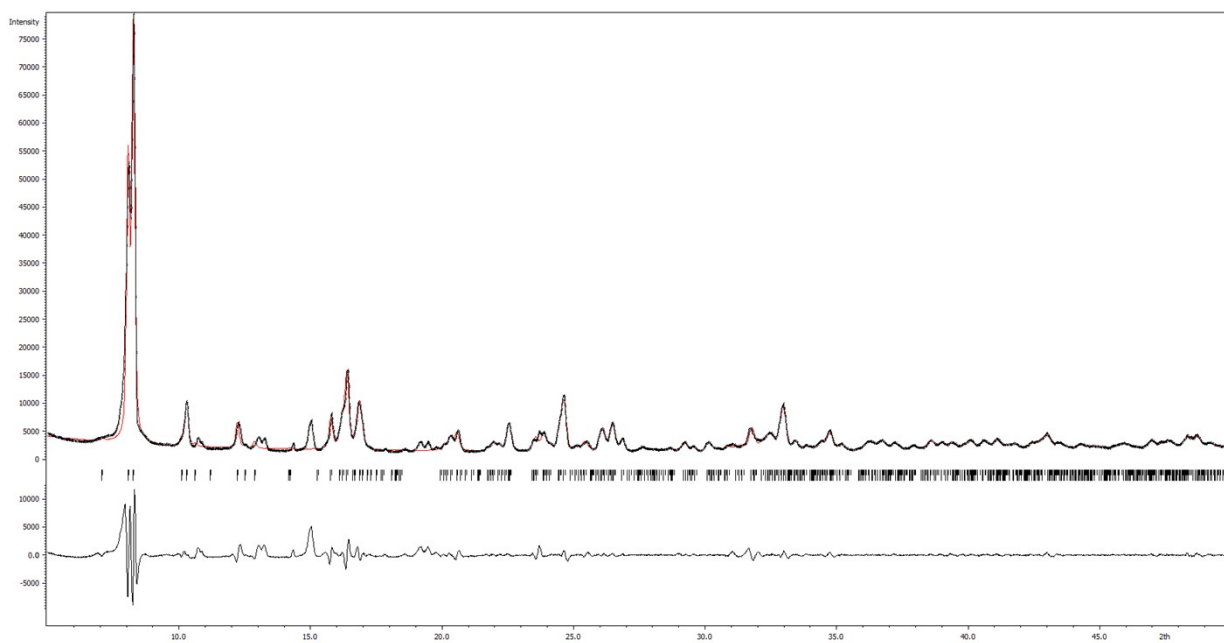

**Figure S32.** Experimental (black) and simulated (red) X-ray powder diffraction patterns of **Ir1**.

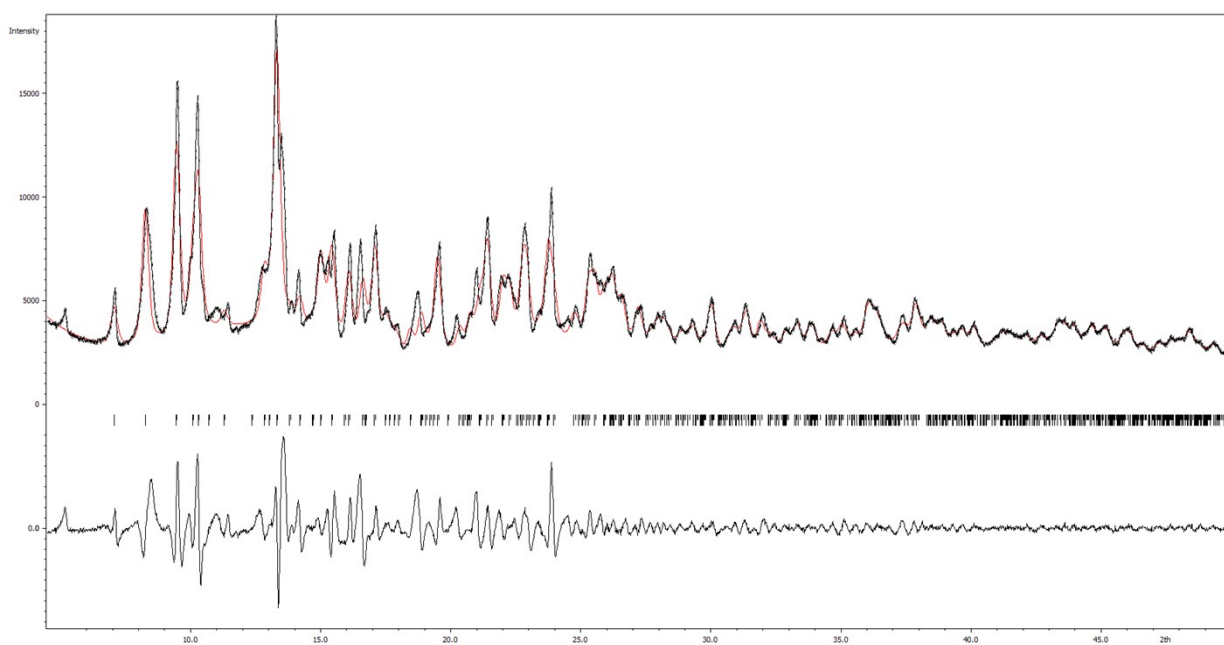

**Figure S33.** Experimental (black) and simulated (red) X-ray powder diffraction patterns of **Ir2**.

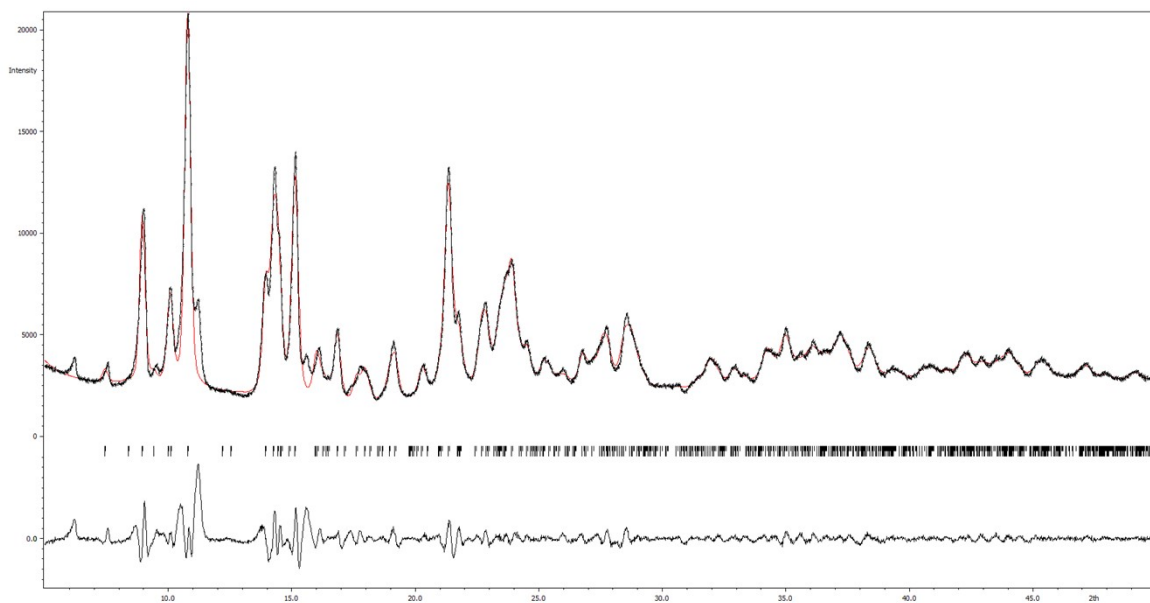

**Figure S34.** Experimental (black) and simulated (red) X-ray powder diffraction patterns of **Ir3**.

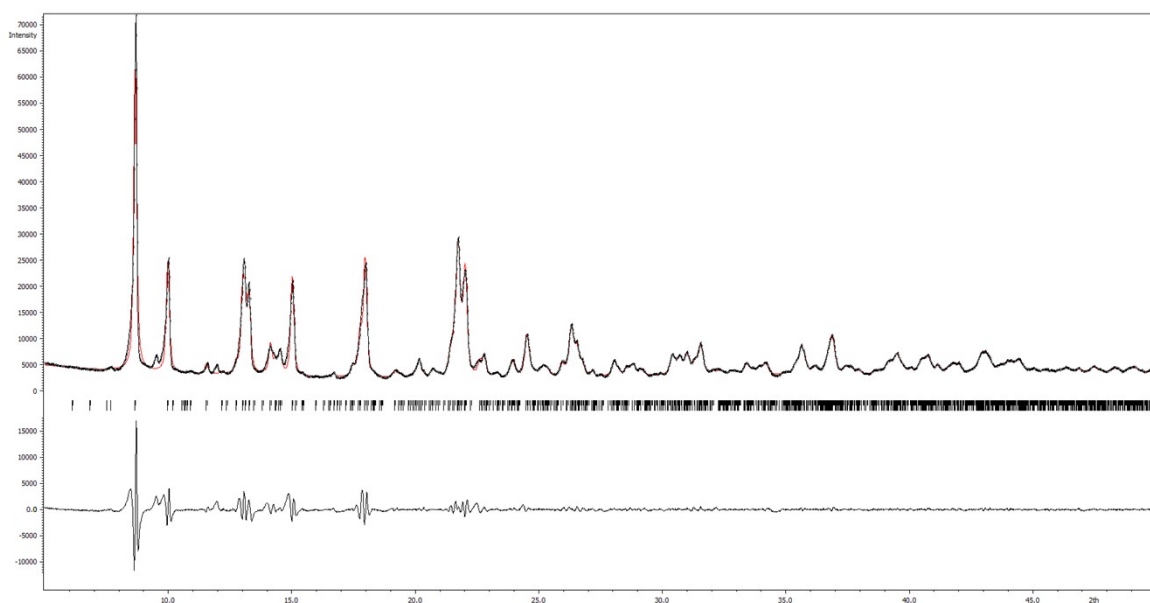

**Figure S35.** Experimental (black) and simulated (red) X-ray powder diffraction patterns of **Ir4**.

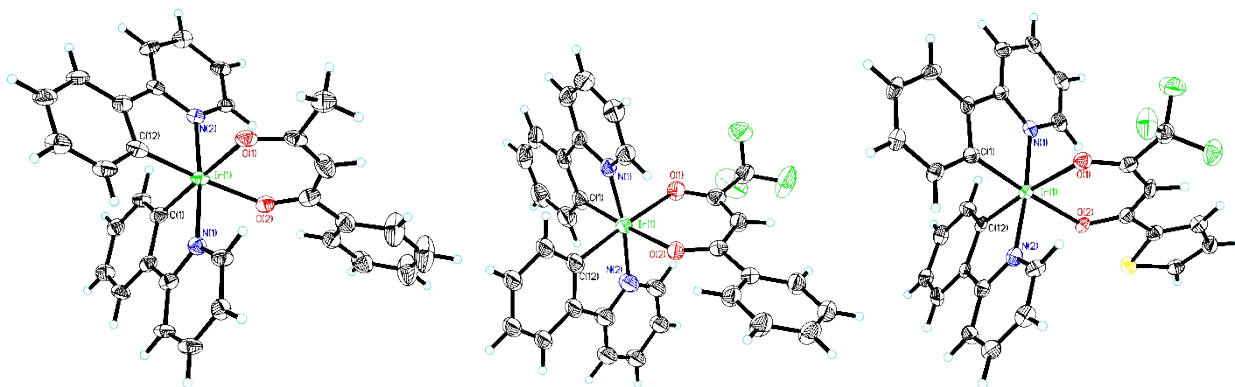

**Figure S36.** Molecular structures of **Ir2**, **Ir3**, **Ir4**. Displacement ellipsoids are drawn at 50% probability level.

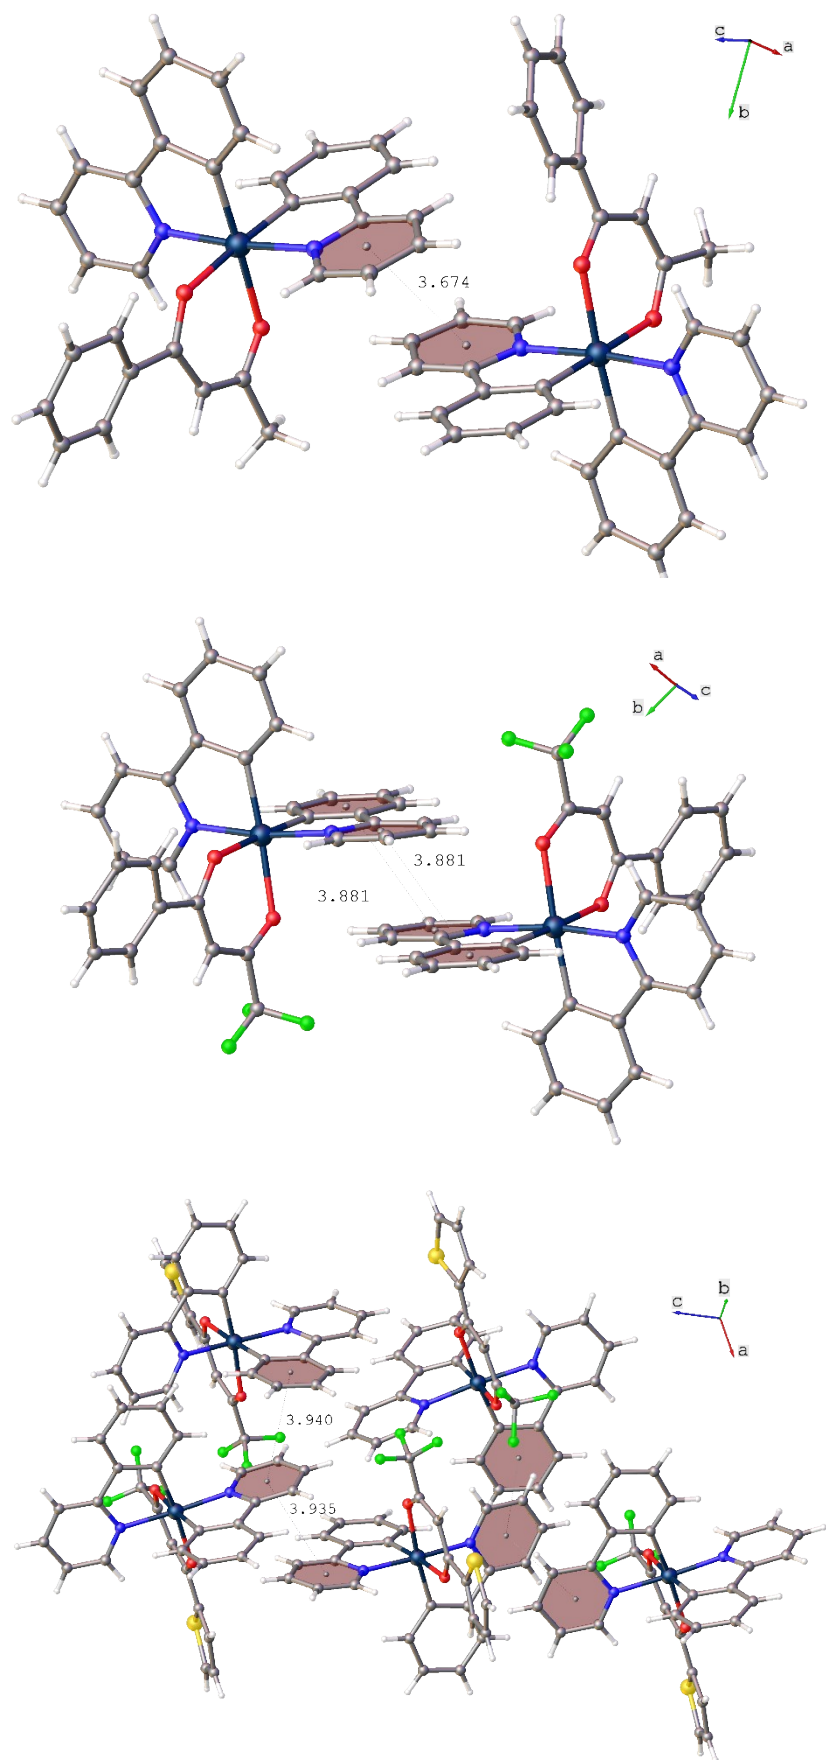

**Figure S37.**  $\pi$ - $\pi$  interactions in complexes Ir2, Ir3, Ir4. Centroid-centroid distances are presented in Å.

4. Spectroscopic study

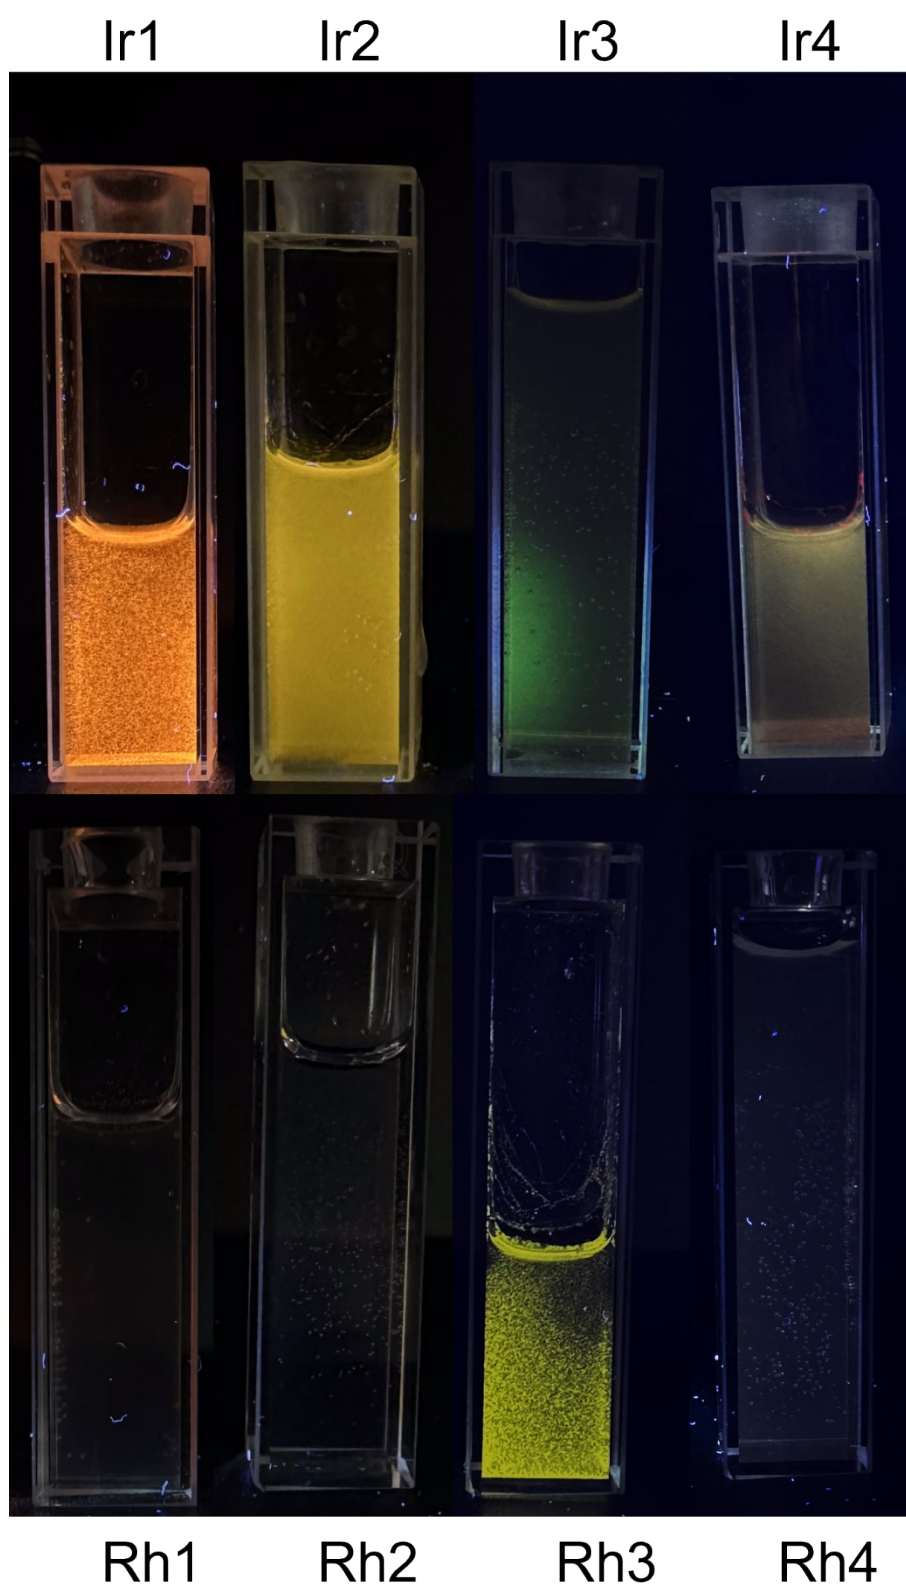

**Figure S38.** Luminescence photographs of **Rh1 – Rh4** and **Ir1 – Ir4** in  $\text{CH}_3\text{CN}/\text{H}_2\text{O}$  (1/3) solution at 298 K ( $\lambda_{\text{ex}} = 365$  nm).

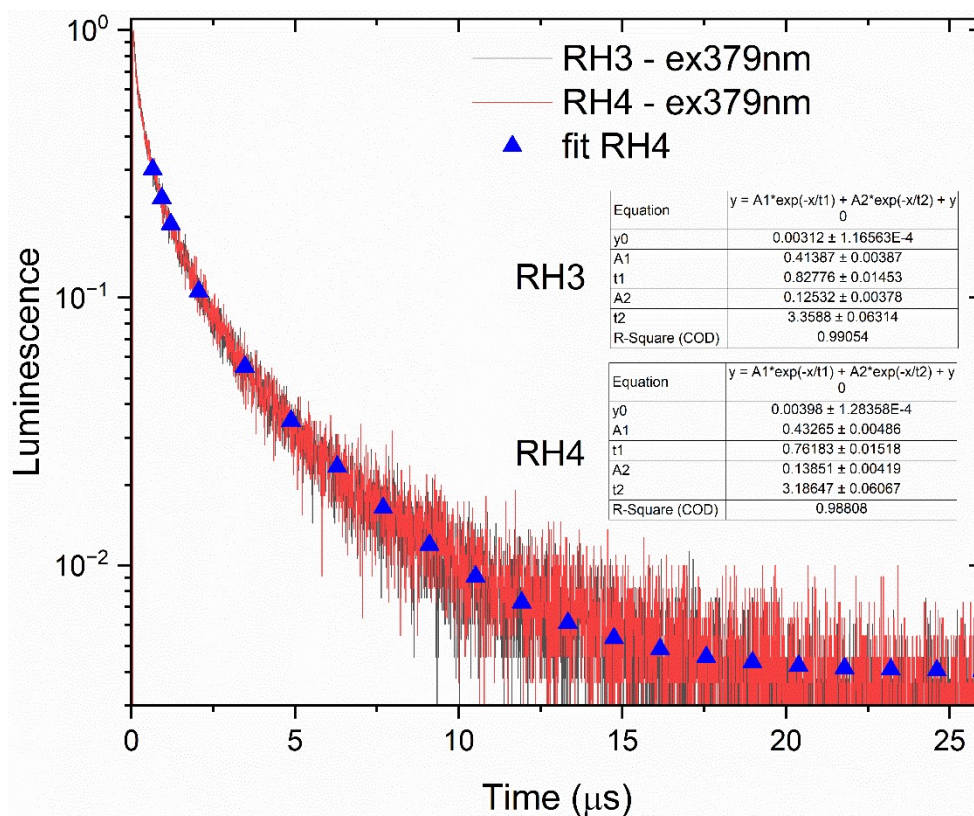

Figure S39. Luminescence decay of **Rh3** – **Rh4** in solid state at 298 K ( $\lambda_{ex} = 379$  nm).

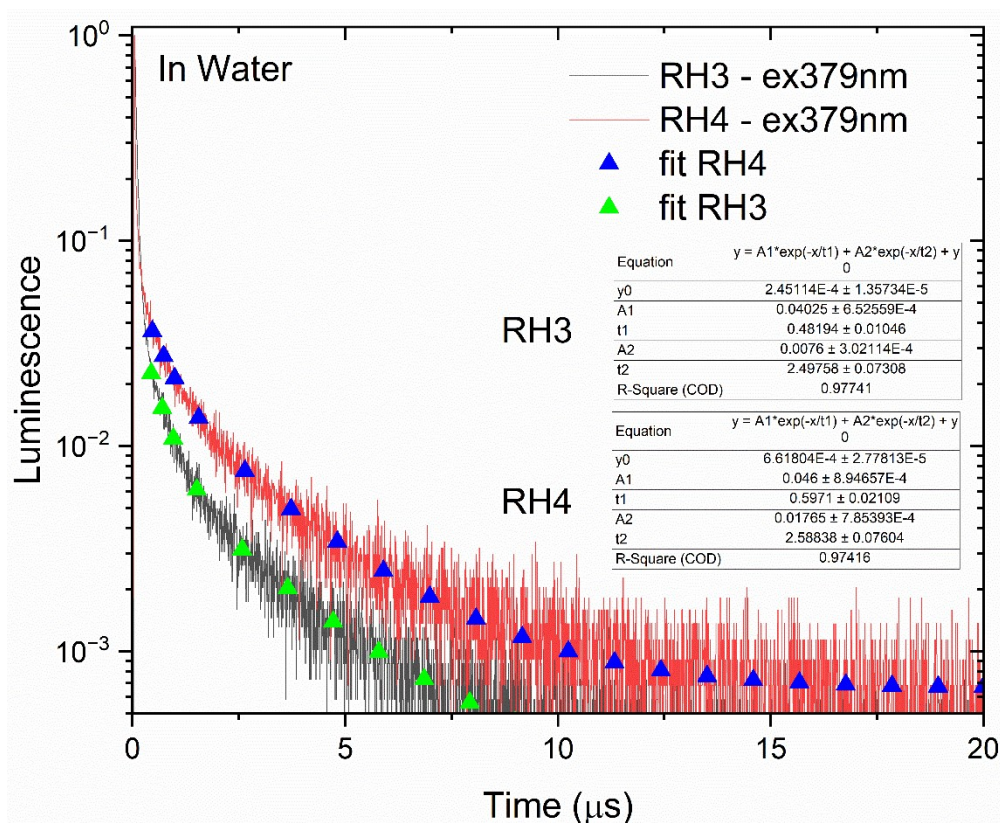

Figure S40. Luminescence decay of **Rh3** – **Rh4** in CH<sub>3</sub>CN/H<sub>2</sub>O (1/3) solution at 298 K ( $\lambda_{ex} = 379$  nm).

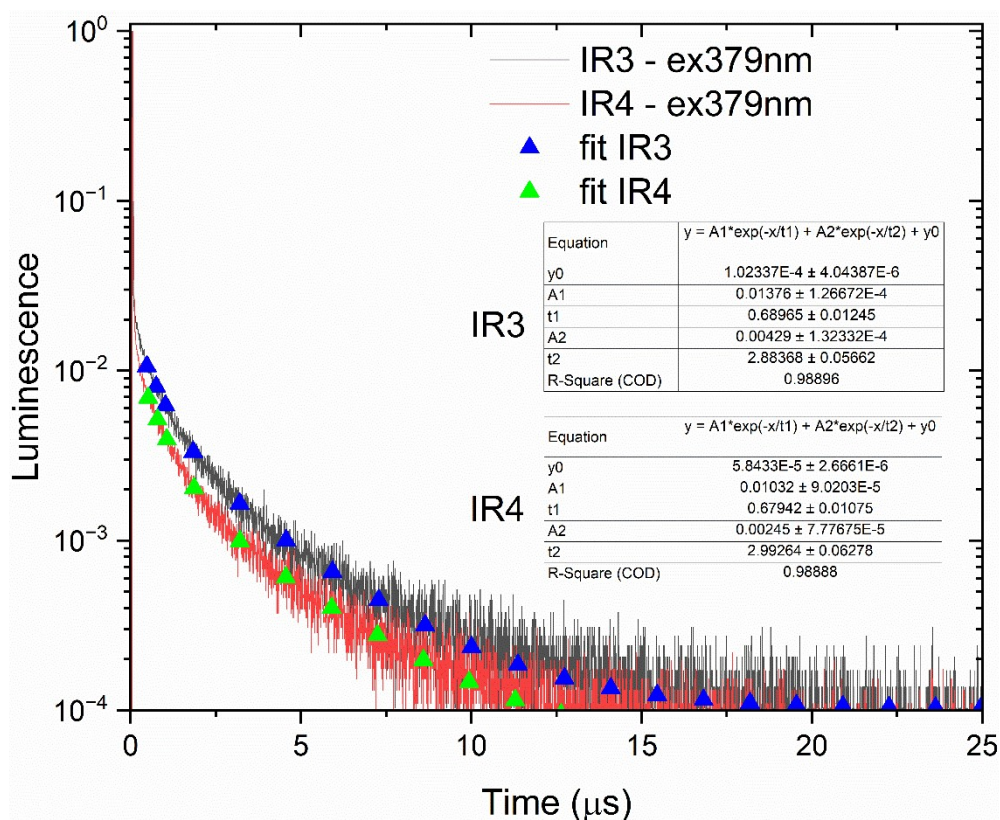

Figure S41. Luminescence decay of Ir3 – Ir4 in solid state at 298 K ( $\lambda_{\text{ex}} = 379$  nm).

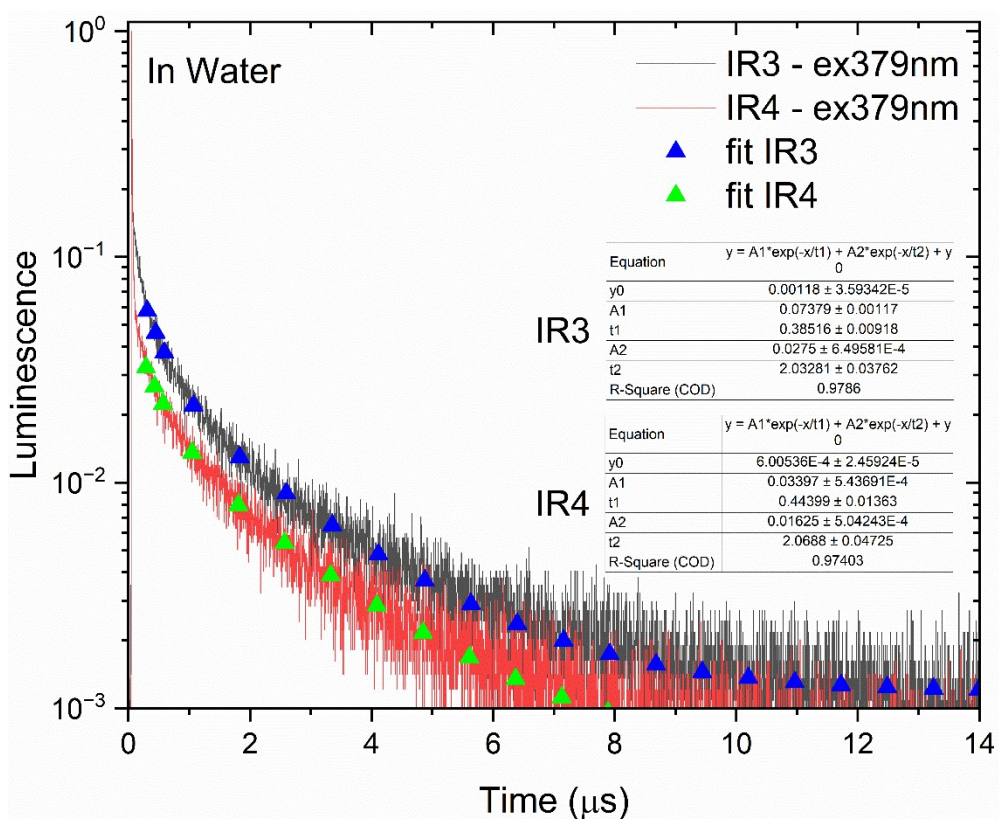

Figure S42. Luminescence decay of Ir3 – Ir4 in  $\text{CH}_3\text{CN}/\text{H}_2\text{O}$  (1/3) solution at 298 K ( $\lambda_{\text{ex}} = 379$  nm).

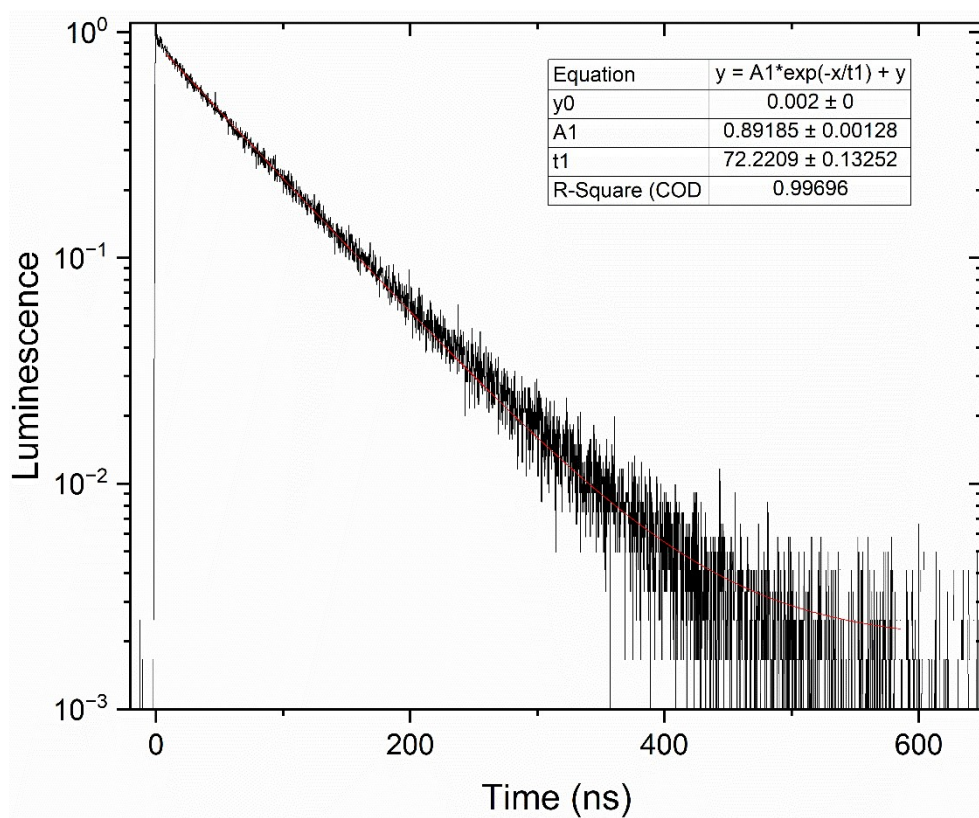

**Figure S43.** Luminescence decay of solid Ir1 at 298 K ( $\lambda_{\text{ex}} = 376$  nm).

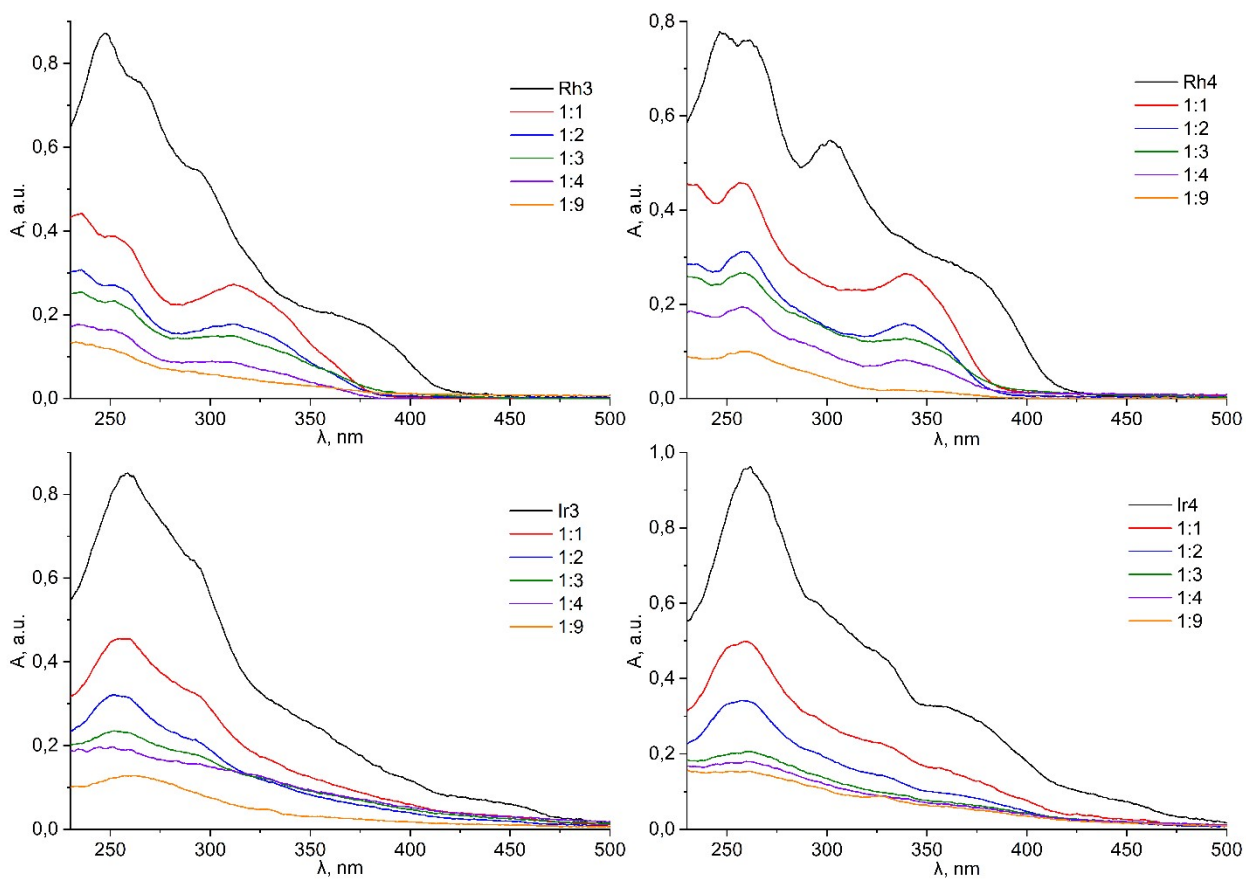

**Figure S44.** Absorption spectra of Rh3 – Rh4 and Ir3 – Ir4 in  $\text{CH}_3\text{CN}$  upon increasing the volume ratio of water from 1:1 to 1:9.



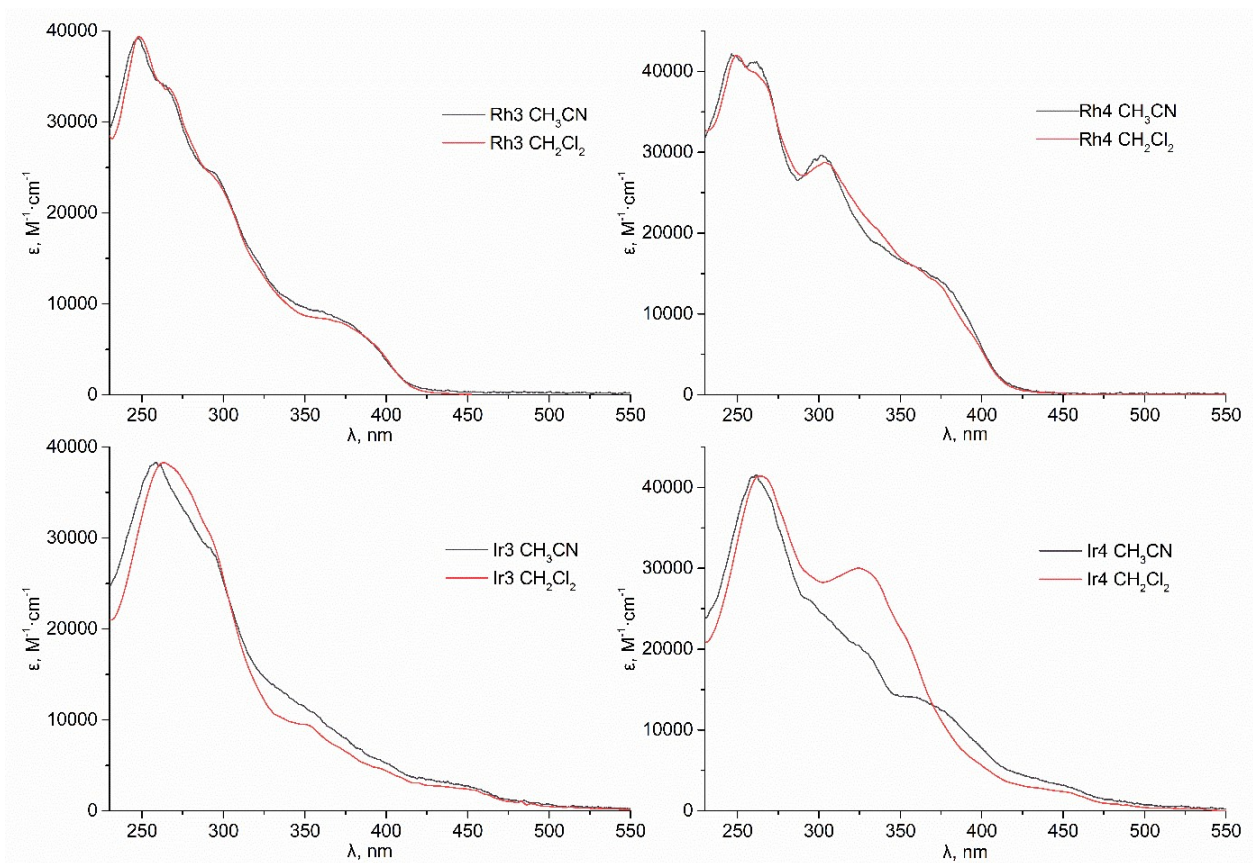

**Figure S45.** Absorption spectra of **Rh3 – Rh4** and **Ir3 – Ir4** in  $\text{CH}_3\text{CN}$  (black) and  $\text{CH}_2\text{Cl}_2$  (red).

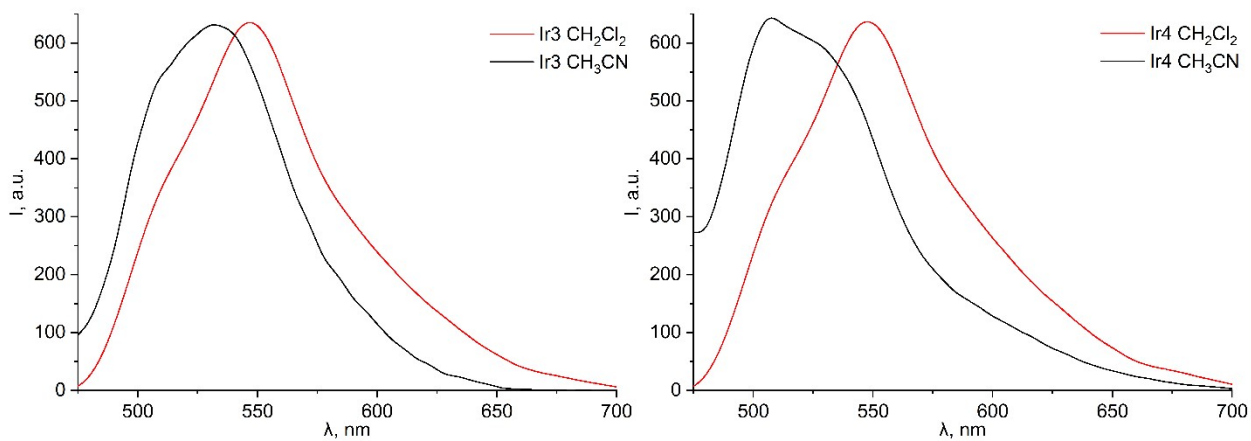

**Figure S46.** Luminescence spectra of **Ir3 – Ir4** in  $\text{CH}_3\text{CN}$  (black) and  $\text{CH}_2\text{Cl}_2$  (red).

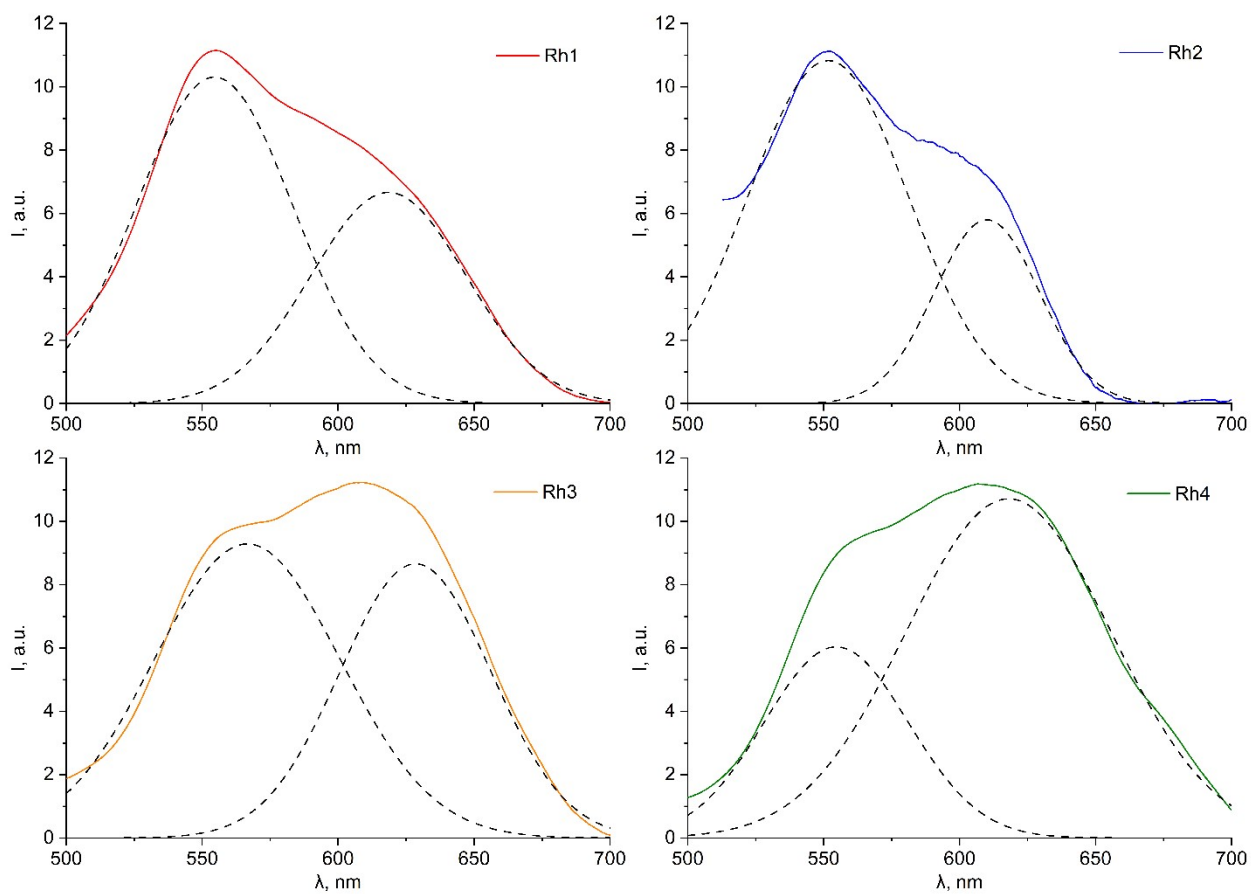

**Figure S47.** Luminescence spectra of Rh1 – Rh4 decomposed into their Gaussian components.

## 5. Computational details

Density functional theory (DFT) calculations were performed with Firefly QC package [9], which is partially based on the GAMESS (US) [10] source code, using the B3LYP functional [11], Stuttgart-Dresden effective core potentials (ECP) for iridium and rhodium and def2-svp basis sets for all other atoms [12, 13]. Frequency analysis was carried out to check if optimized structures were local minima. No imaginary frequencies were found for local minima. Time-dependent DFT (TDDFT) calculations were carried out at the ground state geometries to obtain vertical excitation energies and theoretical absorption spectra. The lowest 30 singlet-singlet excitations were computed. Triplet geometries were calculated using the unrestricted B3LYP method (UB3LYP). Then, single point calculations were performed at the optimized triplet geometry with spin multiplicity 1. The emission energies were calculated by the difference  $E(T_1) - E(S_0)$  in the geometry of  $T_1$ . TDDFT calculations on the optimized triplet geometry with spin multiplicity 1 were performed to obtain energies of the  $T_2$  states. This methodology is proved to provide good estimates of emission energies and emission orbital characteristics [14-16].

**Table S4.** Selected bond lengths in optimized structures of **Rh1 – Ir4** at the ground state.

|        | <b>Rh1</b> | <b>Rh2</b> | <b>Rh3</b> | <b>Rh4</b> | <b>Ir1</b> | <b>Ir2</b> | <b>Ir3</b> | <b>Ir4</b> |
|--------|------------|------------|------------|------------|------------|------------|------------|------------|
| M – C1 | 1.9919     | 1.9928     | 1.9905     | 1.9904     | 2.0050     | 2.0056     | 2.0040     | 2.0040     |
| M – C2 | 1.9938     | 1.9936     | 1.9906     | 1.9909     | 2.0059     | 2.0053     | 2.0039     | 2.0040     |
| M – N1 | 2.0567     | 2.0545     | 2.0575     | 2.0560     | 2.0552     | 2.0552     | 2.0565     | 2.0555     |
| M – N2 | 2.0548     | 2.0558     | 2.0562     | 2.0572     | 2.0547     | 2.0546     | 2.0566     | 2.0565     |
| M – O1 | 2.1776     | 2.1806     | 2.1812     | 2.2021     | 2.1621     | 2.1687     | 2.1791     | 2.1833     |
| M – O2 | 2.1746     | 2.1785     | 2.1992     | 2.1841     | 2.1629     | 2.1661     | 2.1668     | 2.1690     |

**Table S5.** Composition (%) of frontier molecular orbitals for **Rh1 – Ir4**.

| complex |                  | <b>Rh1</b> | <b>Rh2</b> | <b>Rh3</b> | <b>Rh4</b> | <b>Ir1</b> | <b>Ir2</b> | <b>Ir3</b> | <b>Ir4</b> |
|---------|------------------|------------|------------|------------|------------|------------|------------|------------|------------|
| HOMO    | M                | 60         | 61         | 59         | 52         | 60         | 61         | 59         | 52         |
|         | ppy              | 32         | 32         | 35         | 42         | 33         | 32         | 35         | 41         |
|         | O <sup>^</sup> O | 8          | 7          | 6          | 6          | 7          | 7          | 6          | 7          |
|         | energy, eV       | -5.37      | -5.34      | -5.52      | -5.52      | -4.98      | -4.96      | -5.15      | -5.15      |
| LUMO    | M                | 2          | 4          | 2          | 3          | 4          | 3          | 4          | 5          |
|         | ppy              | 15         | 95         | 14         | 12         | 13         | 45         | 14         | 12         |
|         | O <sup>^</sup> O | 83         | 1          | 84         | 85         | 83         | 52         | 82         | 83         |
|         | energy, eV       | -1.65      | -1.56      | -1.82      | -1.92      | -1.81      | -1.56      | -2.00      | -2.09      |

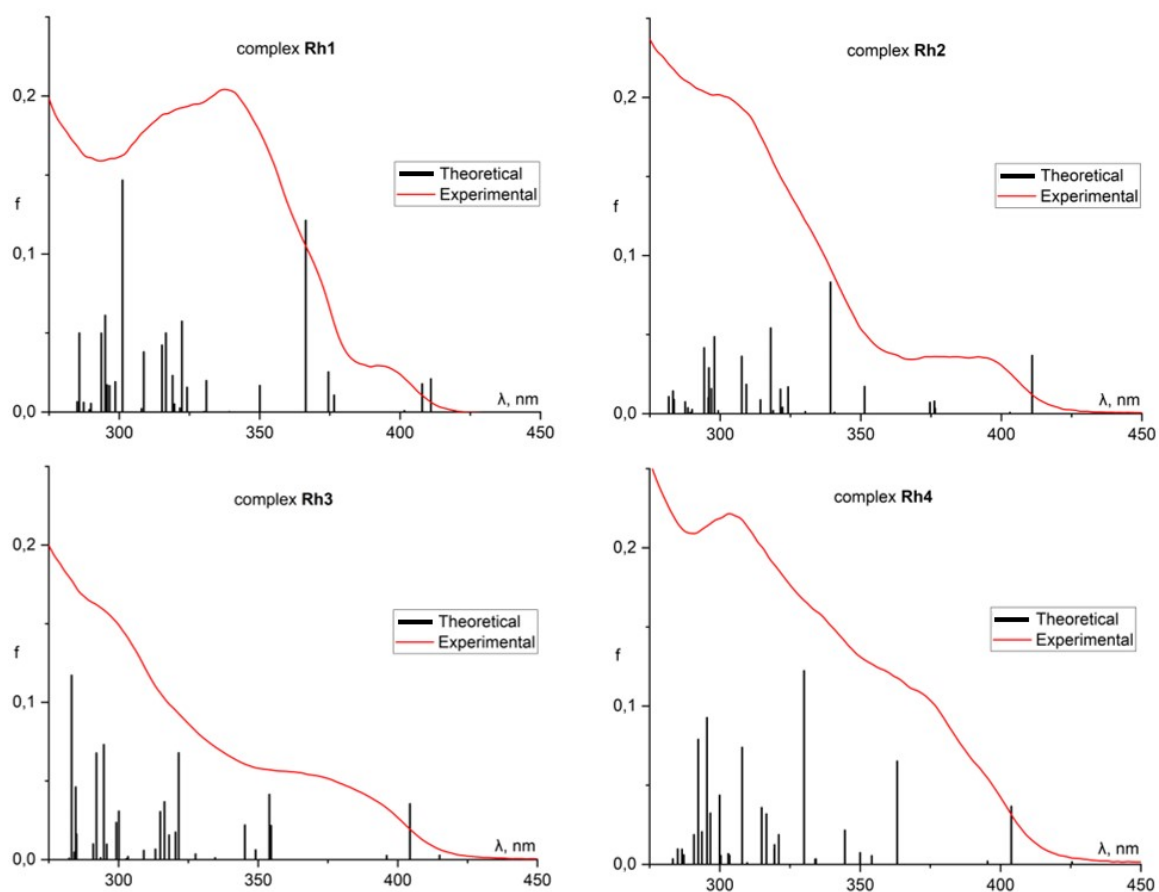

**Figure S48.** Experimental and TDDFT electronic spectra of **Rh1 – Rh4**.

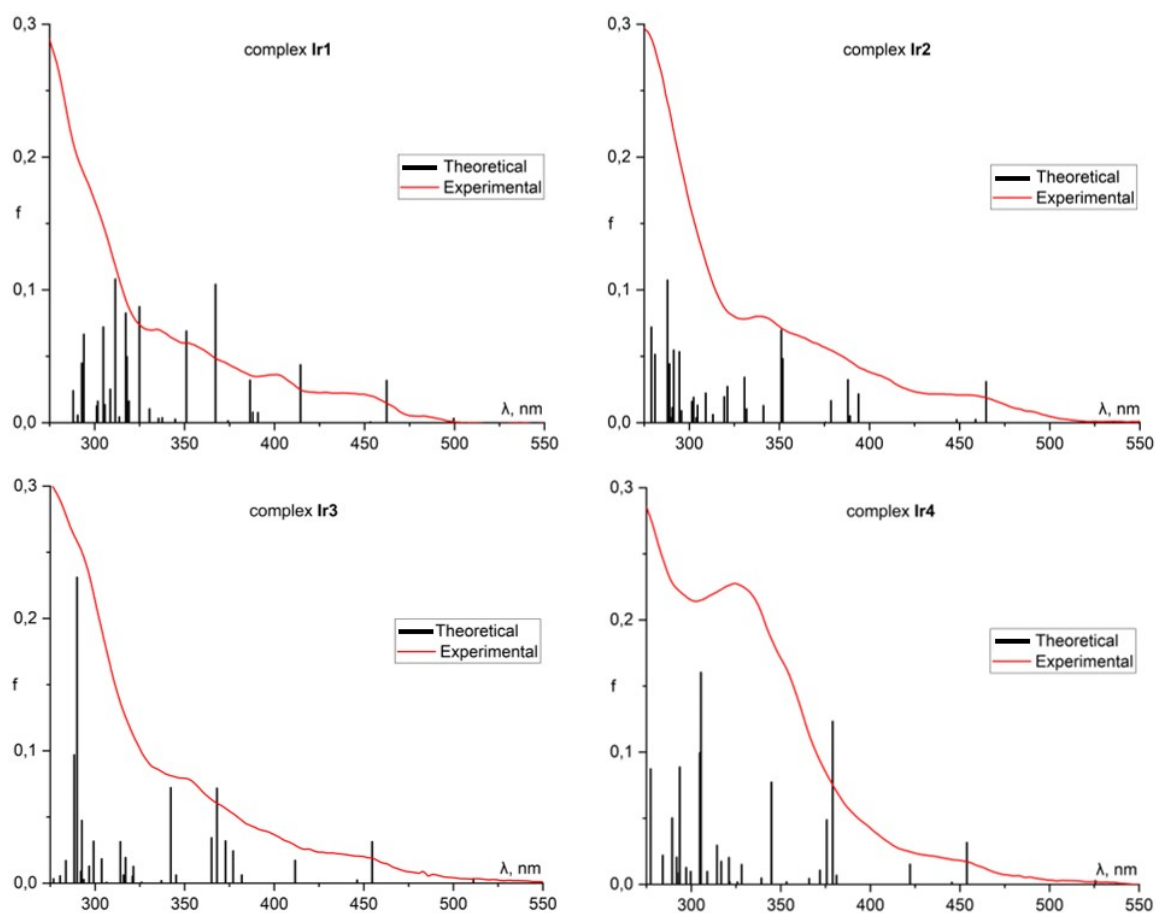

**Figure S49.** Experimental and TDDFT electronic spectra of **Ir1 – Ir4**.

**Table S6.** TDDFT singlet excited states for **Rh1** – **Rh4**.

| Complex    | State      | $\lambda$ / nm (f) | Dominant monoexcitations                                                                                                                                                                                                                                                                                                                    |
|------------|------------|--------------------|---------------------------------------------------------------------------------------------------------------------------------------------------------------------------------------------------------------------------------------------------------------------------------------------------------------------------------------------|
| <b>Rh1</b> | S1         | 410 (0.021)        | H $\rightarrow$ L (54%) $\{d(Rh) \rightarrow \pi^*(O^{\wedge}O), \pi(ppy) \rightarrow \pi^*(O^{\wedge}O)\}$<br>H $\rightarrow$ L+1 (42%) $\{d(Rh) \rightarrow \pi^*(ppy), \pi(ppy) \rightarrow \pi^*(ppy)\}$                                                                                                                                |
|            | S2         | 408 (0.018)        | H $\rightarrow$ L+1 (51%) $\{d(Rh) \rightarrow \pi^*(ppy), \pi(ppy) \rightarrow \pi^*(ppy)\}$<br>H $\rightarrow$ L (44%) $\{d(Rh) \rightarrow \pi^*(O^{\wedge}O), \pi(ppy) \rightarrow \pi^*(O^{\wedge}O)\}$                                                                                                                                |
|            | S4         | 377 (0.011)        | H-1 $\rightarrow$ L+1 (66%) $\{d(Rh) \rightarrow \pi^*(ppy), \pi(O^{\wedge}O) \rightarrow \pi^*(ppy)\}$<br>H-1 $\rightarrow$ L+2 (26%) $\{d(Rh) \rightarrow \pi^*(ppy), \pi(O^{\wedge}O) \rightarrow \pi^*(ppy)\}$                                                                                                                          |
|            | S5         | 374 (0.025)        | H-1 $\rightarrow$ L+2 (48%) $\{d(Rh) \rightarrow \pi^*(ppy), \pi(O^{\wedge}O) \rightarrow \pi^*(ppy)\}$<br>H-1 $\rightarrow$ L+1 (25%) $\{d(Rh) \rightarrow \pi^*(ppy), \pi(O^{\wedge}O) \rightarrow \pi^*(ppy)\}$<br>H-1 $\rightarrow$ L (22%) $\{d(Rh) \rightarrow \pi^*(O^{\wedge}O), \pi(O^{\wedge}O) \rightarrow \pi^*(O^{\wedge}O)\}$ |
|            | S6         | 366 (0.121)        | H-1 $\rightarrow$ L (69%) $\{d(Rh) \rightarrow \pi^*(O^{\wedge}O), \pi(O^{\wedge}O) \rightarrow \pi^*(O^{\wedge}O)\}$<br>H-1 $\rightarrow$ L+2 (21%) $\{d(Rh) \rightarrow \pi^*(ppy), \pi(O^{\wedge}O) \rightarrow \pi^*(ppy)\}$                                                                                                            |
|            | <b>Rh2</b> | S1                 | 411 (0.037)                                                                                                                                                                                                                                                                                                                                 |
| S4         |            | 376 (0.008)        | H-1 $\rightarrow$ L (38%) $\{d(Rh) \rightarrow \pi^*(ppy), \pi(O^{\wedge}O) \rightarrow \pi^*(ppy)\}$<br>H-1 $\rightarrow$ L+1 (31%) $\{d(Rh) \rightarrow \pi^*(ppy), \pi(O^{\wedge}O) \rightarrow \pi^*(ppy)\}$<br>H $\rightarrow$ L+2 (27%) $\{d(Rh) \rightarrow \pi^*(O^{\wedge}O), \pi(ppy) \rightarrow \pi^*(O^{\wedge}O)\}$           |
| S5         |            | 375 (0.007)        | H-1 $\rightarrow$ L+1 (58%) $\{d(Rh) \rightarrow \pi^*(ppy), \pi(O^{\wedge}O) \rightarrow \pi^*(ppy)\}$<br>H-1 $\rightarrow$ L (36%) $\{d(Rh) \rightarrow \pi^*(ppy), \pi(O^{\wedge}O) \rightarrow \pi^*(ppy)\}$                                                                                                                            |
| S6         |            | 351 (0.017)        | H $\rightarrow$ L+3 (96%) $\{d(Rh) \rightarrow \pi^*(ppy), \pi(ppy) \rightarrow \pi^*(ppy)\}$                                                                                                                                                                                                                                               |
| S8         |            | 339 (0.083)        | H-1 $\rightarrow$ L+2 (86%) $\{d(Rh) \rightarrow \pi^*(O^{\wedge}O), \pi(O^{\wedge}O) \rightarrow \pi^*(O^{\wedge}O)\}$                                                                                                                                                                                                                     |
| <b>Rh3</b> | S1         | 415 (0.003)        | H $\rightarrow$ L (96%) $\{d(Rh) \rightarrow \pi^*(O^{\wedge}O), \pi(ppy) \rightarrow \pi^*(O^{\wedge}O)\}$                                                                                                                                                                                                                                 |
|            | S2         | 404 (0.036)        | H $\rightarrow$ L+1 (90%) $\{d(Rh) \rightarrow \pi^*(ppy), \pi(ppy) \rightarrow \pi^*(ppy)\}$                                                                                                                                                                                                                                               |
|            | S3         | 396 (0.003)        | H $\rightarrow$ L+2 (93%) $\{d(Rh) \rightarrow \pi^*(ppy), \pi(ppy) \rightarrow \pi^*(ppy)\}$                                                                                                                                                                                                                                               |
|            | S4         | 355 (0.022)        | H-1 $\rightarrow$ L+1 (50%) $\{d(Rh) \rightarrow \pi^*(ppy), \pi(O^{\wedge}O) \rightarrow \pi^*(ppy)\}$<br>H-1 $\rightarrow$ L+2 (26%) $\{d(Rh) \rightarrow \pi^*(ppy), \pi(O^{\wedge}O) \rightarrow \pi^*(ppy)\}$<br>H-1 $\rightarrow$ L (15%) $\{d(Rh) \rightarrow \pi^*(O^{\wedge}O), \pi(O^{\wedge}O) \rightarrow \pi^*(O^{\wedge}O)\}$ |
|            | S5         | 354 (0.041)        | H-1 $\rightarrow$ L (57%) $\{d(Rh) \rightarrow \pi^*(O^{\wedge}O), \pi(O^{\wedge}O) \rightarrow \pi^*(O^{\wedge}O)\}$<br>H-1 $\rightarrow$ L+1 (30%) $\{d(Rh) \rightarrow \pi^*(ppy), \pi(O^{\wedge}O) \rightarrow \pi^*(ppy)\}$                                                                                                            |
| <b>Rh4</b> | S1         | 425 (0.0015)       | H $\rightarrow$ L (98%) $\{d(Rh) \rightarrow \pi^*(O^{\wedge}O), \pi(ppy) \rightarrow \pi^*(O^{\wedge}O)\}$                                                                                                                                                                                                                                 |
|            | S2         | 404 (0.037)        | H $\rightarrow$ L+1 (93%) $\{d(Rh) \rightarrow \pi^*(ppy), \pi(ppy) \rightarrow \pi^*(ppy)\}$                                                                                                                                                                                                                                               |
|            | S4         | 363 (0.065)        | H-1 $\rightarrow$ L (87%) $\{d(Rh) \rightarrow \pi^*(O^{\wedge}O), \pi(O^{\wedge}O) \rightarrow \pi^*(O^{\wedge}O)\}$                                                                                                                                                                                                                       |
|            | S7         | 345 (0.022)        | H $\rightarrow$ L+3 (93%) $\{d(Rh) \rightarrow \pi^*(ppy), \pi(ppy) \rightarrow \pi^*(ppy)\}$                                                                                                                                                                                                                                               |
|            | S10        | 330 (0.122)        | H-3 $\rightarrow$ L (73%) $\{d(Rh) \rightarrow \pi^*(O^{\wedge}O), \pi(ppy) \rightarrow \pi^*(O^{\wedge}O)\}$<br>H-2 $\rightarrow$ L (5%) $\{\pi(ppy) \rightarrow \pi^*(O^{\wedge}O)\}$                                                                                                                                                     |

**Table S7.** TDDFT singlet excited states for **Ir1 – Ir4**.

|            |     |             |                                                                                                                                                                                                                                                                                                                                                                                                            |
|------------|-----|-------------|------------------------------------------------------------------------------------------------------------------------------------------------------------------------------------------------------------------------------------------------------------------------------------------------------------------------------------------------------------------------------------------------------------|
| <b>Ir1</b> | S1  | 500 (0.003) | H → L (99%) { $d(Ir) \rightarrow \pi^*(O^{\wedge}O)$ , $\pi(ppy) \rightarrow \pi^*(O^{\wedge}O)$ }                                                                                                                                                                                                                                                                                                         |
|            | S2  | 462 (0.032) | H → L+1 (95%) { $d(Ir) \rightarrow \pi^*(ppy)$ , $\pi(ppy) \rightarrow \pi^*(ppy)$ }                                                                                                                                                                                                                                                                                                                       |
|            | S4  | 414 (0.044) | H-1 → L (95%) { $d(Ir) \rightarrow \pi^*(O^{\wedge}O)$ , $\pi(O^{\wedge}O) \rightarrow \pi^*(O^{\wedge}O)$ }                                                                                                                                                                                                                                                                                               |
|            | S7  | 386 (0.032) | H → L+3 (67%) { $d(Ir) \rightarrow \pi^*(ppy)$ , $\pi(ppy) \rightarrow \pi^*(ppy)$ }<br>H-1 → L+2 (27%) { $d(Ir) \rightarrow \pi^*(ppy)$ , $\pi(O^{\wedge}O) \rightarrow \pi^*(ppy)$ }                                                                                                                                                                                                                     |
|            | S9  | 367 (0.104) | H-2 → L (89%) { $d(Ir) \rightarrow \pi^*(O^{\wedge}O)$ }<br>H-2 → L+2 (8%) { $d(Ir) \rightarrow \pi^*(ppy)$ }                                                                                                                                                                                                                                                                                              |
| <b>Ir2</b> | S1  | 465 (0.031) | H → L+1 (80%) { $d(Ir) \rightarrow \pi^*(ppy)$ , $\pi(ppy) \rightarrow \pi^*(ppy)$ }<br>H → L (17%) { $d(Ir) \rightarrow \pi^*(O^{\wedge}O)$ , $\pi(ppy) \rightarrow \pi^*(O^{\wedge}O)$ }                                                                                                                                                                                                                 |
|            | S4  | 394 (0.022) | H-1 → L (63%) { $d(Ir) \rightarrow \pi^*(ppy)$ , $\pi(O^{\wedge}O) \rightarrow \pi^*(O^{\wedge}O)$ }<br>H-1 → L+2 (18%) { $d(Ir) \rightarrow \pi^*(ppy)$ , $\pi(O^{\wedge}O) \rightarrow \pi^*(O^{\wedge}O)$ }<br>H → L+3 (14%) { $d(Ir) \rightarrow \pi^*(ppy)$ , $\pi(ppy) \rightarrow \pi^*(ppy)$ }                                                                                                     |
|            | S6  | 388 (0.032) | H → L+3 (70%) { $d(Ir) \rightarrow \pi^*(ppy)$ , $\pi(ppy) \rightarrow \pi^*(ppy)$ }<br>H-1 → L+1 (12%) { $d(Ir) \rightarrow \pi^*(ppy)$ , $\pi(O^{\wedge}O) \rightarrow \pi^*(ppy)$ }<br>H-1 → L (8%) { $d(Ir) \rightarrow \pi^*(ppy)$ , $\pi(O^{\wedge}O) \rightarrow \pi^*(O^{\wedge}O)$ }                                                                                                              |
|            | S9  | 352 (0.048) | H-2 → L (84%) { $d(Ir) \rightarrow \pi^*(ppy)$ , $d(Ir) \rightarrow \pi^*(O^{\wedge}O)$ }<br>H-2 → L+2 (6%) { $d(Ir) \rightarrow \pi^*(ppy)$ , $d(Ir) \rightarrow \pi^*(O^{\wedge}O)$ }                                                                                                                                                                                                                    |
|            | S10 | 351 (0.070) | H-2 → L+1 (86%) { $d(Ir) \rightarrow \pi^*(ppy)$ }<br>H-1 → L+2 (6%) { $d(Ir) \rightarrow \pi^*(ppy)$ , $\pi(O^{\wedge}O) \rightarrow \pi^*(O^{\wedge}O)$ }                                                                                                                                                                                                                                                |
| <b>Ir3</b> | S1  | 511 (0.003) | H → L (99%) { $d(Ir) \rightarrow \pi^*(O^{\wedge}O)$ , $\pi(ppy) \rightarrow \pi^*(O^{\wedge}O)$ }                                                                                                                                                                                                                                                                                                         |
|            | S2  | 455 (0.031) | H → L+1 (91%) { $d(Ir) \rightarrow \pi^*(ppy)$ , $\pi(ppy) \rightarrow \pi^*(ppy)$ }                                                                                                                                                                                                                                                                                                                       |
|            | S4  | 412 (0.017) | H-1 → L (96%) { $d(Ir) \rightarrow \pi^*(O^{\wedge}O)$ , $\pi(O^{\wedge}O) \rightarrow \pi^*(O^{\wedge}O)$ }                                                                                                                                                                                                                                                                                               |
|            | S8  | 368 (0.072) | H-2 → L (48%) { $d(Ir) \rightarrow \pi^*(O^{\wedge}O)$ }<br>H → L+4 (43%) { $d(Ir) \rightarrow \pi^*(ppy)$ , $\pi(ppy) \rightarrow \pi^*(ppy)$ }                                                                                                                                                                                                                                                           |
|            | S9  | 365 (0.034) | H-2 → L (37%) { $d(Ir) \rightarrow \pi^*(O^{\wedge}O)$ }<br>H → L+4 (21%) { $d(Ir) \rightarrow \pi^*(ppy)$ , $\pi(ppy) \rightarrow \pi^*(ppy)$ }<br>H-1 → L+2 (14%) { $d(Ir) \rightarrow \pi^*(ppy)$ , $\pi(O^{\wedge}O) \rightarrow \pi^*(ppy)$ }<br>H-1 → L+1 (12%) { $d(Ir) \rightarrow \pi^*(ppy)$ , $\pi(O^{\wedge}O) \rightarrow \pi^*(ppy)$ }<br>H-2 → L+2 (12%) { $d(Ir) \rightarrow \pi^*(ppy)$ } |
| <b>Ir4</b> | S1  | 526 (0.003) | H → L (98%) { $d(Ir) \rightarrow \pi^*(O^{\wedge}O)$ , $\pi(ppy) \rightarrow \pi^*(O^{\wedge}O)$ }                                                                                                                                                                                                                                                                                                         |
|            | S2  | 454 (0.032) | H → L+1 (93%) { $d(Ir) \rightarrow \pi^*(ppy)$ , $\pi(ppy) \rightarrow \pi^*(ppy)$ }                                                                                                                                                                                                                                                                                                                       |
|            | S6  | 379 (0.123) | H-2 → L (67%) { $d(Ir) \rightarrow \pi^*(O^{\wedge}O)$ }<br>H-1 → L+1 (24%) { $d(Ir) \rightarrow \pi^*(ppy)$ , $\pi(O^{\wedge}O) \rightarrow \pi^*(ppy)$ }                                                                                                                                                                                                                                                 |
|            | S7  | 376 (0.049) | H-1 → L+1 (34%) { $d(Ir) \rightarrow \pi^*(ppy)$ , $\pi(O^{\wedge}O) \rightarrow \pi^*(ppy)$ }<br>H-1 → L+2 (33%) { $d(Ir) \rightarrow \pi^*(ppy)$ , $\pi(O^{\wedge}O) \rightarrow \pi^*(ppy)$ }<br>H-2 → L (16%) { $d(Ir) \rightarrow \pi^*(O^{\wedge}O)$ }<br>H → L+3 (6%) { $d(Ir) \rightarrow \pi^*(ppy)$ , $\pi(ppy) \rightarrow \pi^*(ppy)$ }<br>H-2 → L+1 (6%) { $d(Ir) \rightarrow \pi^*(ppy)$ }   |
|            | S11 | 345 (0.077) | H-2 → L+1 (64%) { $d(Ir) \rightarrow \pi^*(ppy)$ }<br>H-2 → L+2 (20%) { $d(Ir) \rightarrow \pi^*(ppy)$ }<br>H-1 → L+2 (9%) { $d(Ir) \rightarrow \pi^*(ppy)$ , $\pi(O^{\wedge}O) \rightarrow \pi^*(ppy)$ }                                                                                                                                                                                                  |

**Table S8.** Spin density distribution (%) for complexes **Rh1 – Rh4, Ir1 – Ir4** at their  $T_1$  states.

| complex |                  | <b>Rh1</b> | <b>Rh2</b> | <b>Rh3</b> | <b>Rh4</b> | <b>Ir1</b> | <b>Ir2</b> | <b>Ir3</b> | <b>Ir4</b> |
|---------|------------------|------------|------------|------------|------------|------------|------------|------------|------------|
| moiety  | M                | 3          | 7          | 11         | 10         | 16         | 18         | 19         | 20         |
|         | O <sup>^</sup> O | 96         | 92         | 88         | 89         | 71         | 68         | 64         | 61         |
|         | C <sup>^</sup> N | 1          | 1          | 1          | 1          | 13         | 14         | 17         | 19         |

**Table S9.** Experimental and calculated emission wavelength for complexes **Rh1 – Rh4** from the triplet excited state (calculated as  $\lambda = hc/DE$ , where DE is  $E(T_1) - E(S_0)$  in  $T_1$  geometry or  $E(T_2) - E(S_0)$  in  $T_1$  geometry).

| complex    | $\lambda_{\text{exp}}$ , nm |     | $\lambda_{\text{theor}}$ , nm |     |
|------------|-----------------------------|-----|-------------------------------|-----|
| <b>Rh1</b> | 555                         | 619 | 457                           | 566 |
| <b>Rh2</b> | 552                         | 610 | 482                           | 566 |
| <b>Rh3</b> | 567                         | 628 | 550                           | 602 |
| <b>Rh4</b> | 555                         | 618 | 544                           | 589 |

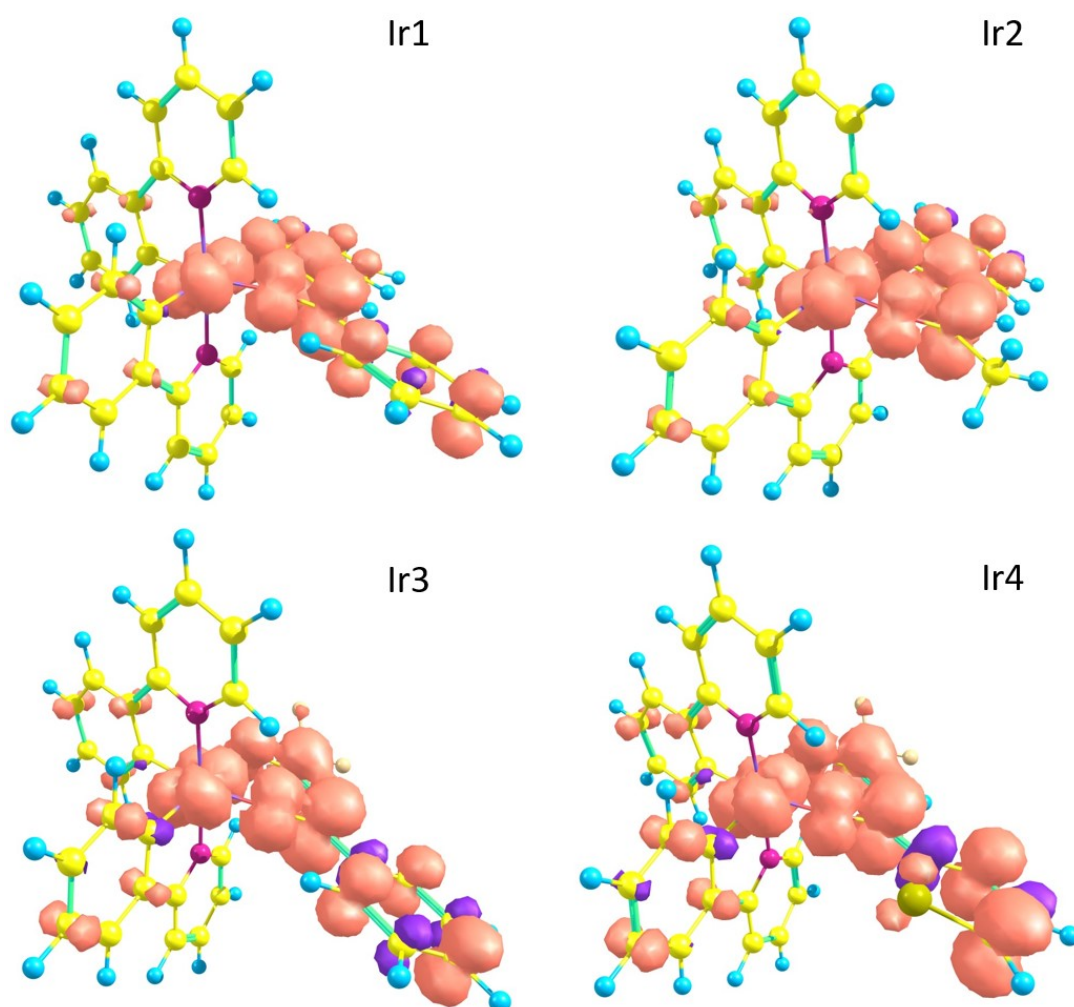

**Figure S50.** Spin density distribution (SDD) of the lowest triplet excited states ( $T_1$ ) in complexes **Ir1 – Ir4**.

## References:

1. M. S. Wrighton, D. S. Ginley and D. L. Morse, *J. Phys. Chem.*, 1974, 78, 2229–2233.
2. J. C. De Mello, H. F. Wittmann and R. H. Friend, *Adv. Mater.*, 1997, 9, 230–232.
3. N. C. Greenham, I. D. W. Samuel, G. R. Hayes, R. T. Phillips, Y. A. R. R. Kessener, S. C. Moratti, A. B. Holmes and R. H. Friend, *Chem. Phys. Lett.*, 1995, 241, 89–96.
4. G.M. Sheldrick, SADABS. Version 2008/1. 2008. Bruker AXS Inc. Germany.
5. G.M. Sheldrick, *Acta Cryst.*, 2015, A71, 3–8.
6. G.M. Sheldrick, *Acta Cryst.*, 2015, C71, 3–8.
7. A.L. Spek, *Acta Cryst.* 2015, C71, 9–18.
8. O.V. Dolomanov, L.J. Bourhis, R.J. Gildea, J.A.K. Howard, H. Puschmann, *J. Appl. Cryst.*, 2009, 42, 339–341.
9. A.A. Granovsky, Firefly version 7.1.G. <http://classic.chem.msu.su/gran/firefly/index.html>
10. M.W. Schmidt, K.K. Baldridge, J.A. Boatz, S.T. Elbert, M.S. Gordon, J.H. Jensen, S. Koseki, N. Matsunaga, K.A. Nguyen, S. Su, T.L. Windus, M. Dupius, J.A. Montgomery, *J. Comput.Chem.*, 1993, 14, 1347.
11. P.J. Stephens, F.J. Devlin, C.F. Chabalowski, M.J. Frisch, *J. Phys. Chem.*, 1994, 98, 11623.
12. D. Andrae, U. Haussermann, M. Dolg, H. Stoll, H. Preuss, *Theor. Chim. Acta.*, 1990, 77, 123.
13. R. Krishnan, J.S. Binkley, R. Seeger, J.A. Pople, *J. Chem. Phys.*, 1980, 72, 650.
14. F. D. Angelis, S. Fantacci, N. Evans, C. Klein, S. M. Zakeeruddin, J. E. Moser, K. Kalyanasundaram, H. J. Bolink, M. Grätzel, M. K. Nazeeruddin, *Inorg. Chem.* 2007, 46, 5989–6001.
15. P. J. Hay, *J. Phys. Chem. A*, 2002, 106, 8, 1634–1641.
16. S. Urinda, G. Das, A. Pramanik, P. Sarkar, *Phys. Chem. Chem. Phys.*, 2017, 19, 43, 29629–29640.
